# Supplementary material
Source: PubMed Central journal article supplement (PMC4879388)
Supplement: AAC.02929-15_zac006165221so1.pdf [file AAC.02929-15_zac006165221so1.pdf]

## 1 Supplementary Materials

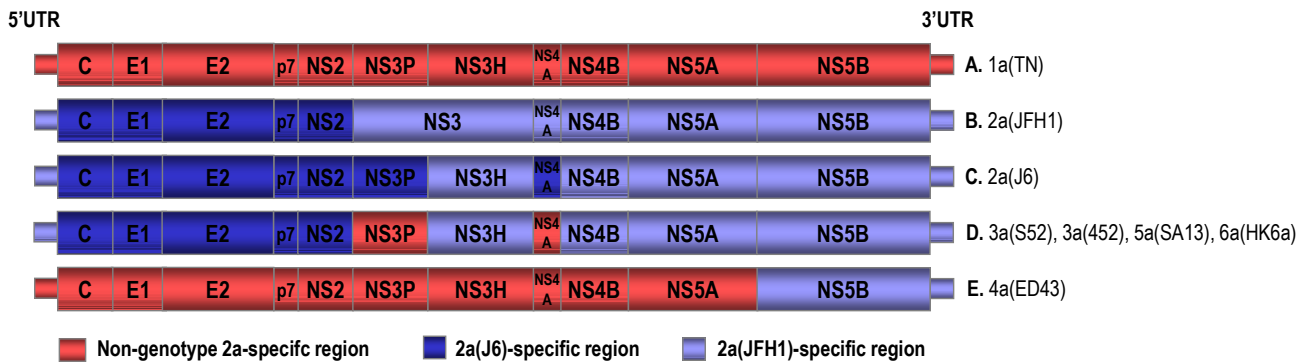

2

### 3 Supplementary Figure S1. Graphical presentation of HCV recombinants used in this study.

4 The recombinants used were designated according to the genotype(isolate) of their NS3P/NS4A  
 5 sequence as indicated on the right. HCV proteins are indicated as C, Core; E1 and E2, envelope  
 6 proteins 1 and 2; p7; NS2-NS5B, non-structural proteins 2-5B. 5' and 3' untranslated regions (UTRs)  
 7 are indicated above the genomes. Genomic regions derived from genotype(isolate) 1a(TN),  
 8 3a(S52), 3a(452), 5a(SA13), 6a(HK6a), or 4a(ED43) are shown in red. Genomic regions derived  
 9 from genotype(isolate) 2a(J6) or 2a(JFH1) are indicated in dark blue or light blue, respectively. (A)  
 10 1a(TN) is identical with TN full-length +LSGF/A1226G/Q1773H (1); for single-cycle production  
 11 assays, a further adapted 1a(TN) full-length recombinant (TNcc) was used (1). (B) 2a(JFH1) is  
 12 identical with J6/JFH1 (2) and contains Core-NS2 of genotype(isolate) 2a(J6) as well as 5'UTR and  
 13 NS3-3'UTR of 2a(JFH1). (C) 2a(J6) is identical with 2a(J6) described in (3) and contains 2a(J6)  
 14 specific Core-NS3P and NS4A, while remaining genome regions are from 2a(JFH1). (D) 3a(S52),  
 15 3a(452), 5a(SA13), and 6a(HK6a) are identical with 3a(S52)mut7, 3a(452), 5a(SA13)mut7, and  
 16 6a(HK6a)mut6, described in (3) and contain genotype(isolate)-specific NS3P/NS4A, while  
 17 remaining genome regions are derived from 2a(J6) or 2a(JFH1) as indicated. (E) 4a(ED43) is  
 18 identical with 4a(ED43)5-5A\_LS/R781W/A1309P/A1786V (4) and contains 5'UTR-NS5A of  
 19 genotype(isolate) 4a(ED43) and NS5B-3'UTR of 2a(JFH1).

20

21

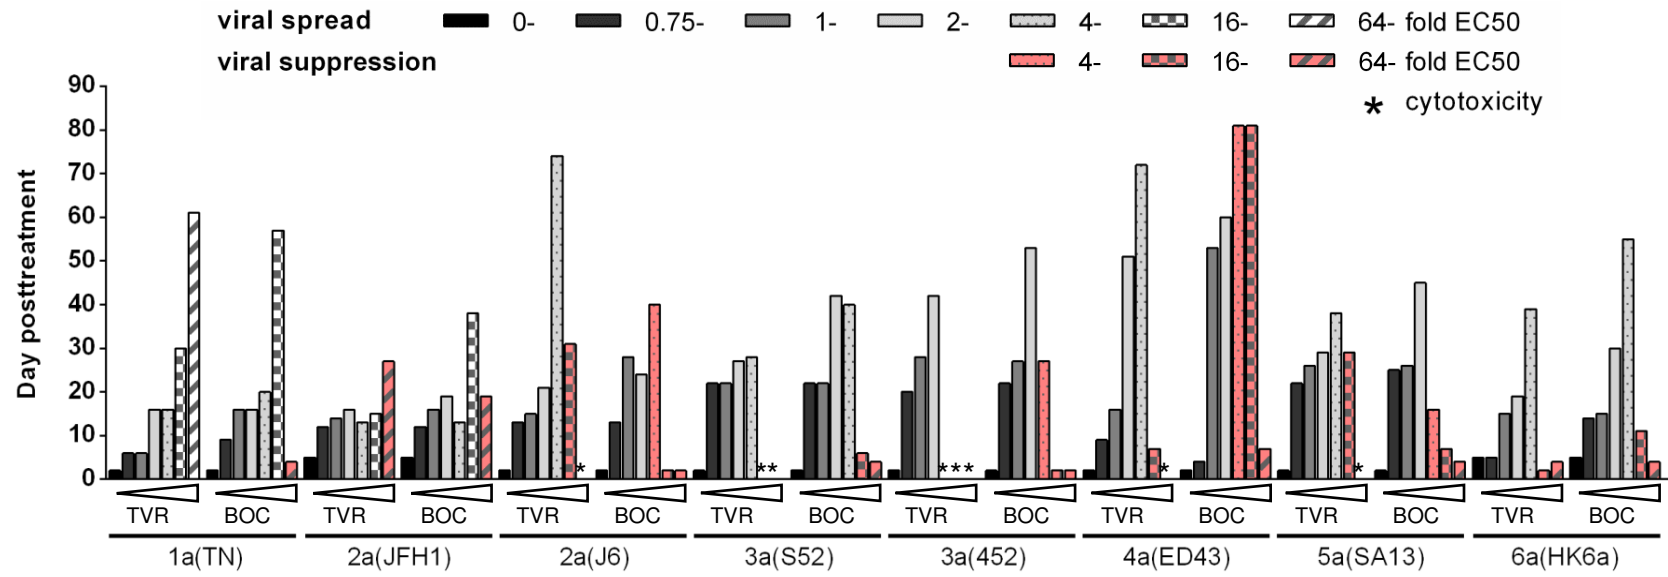

22 **Supplementary Figure S2. Induction of viral escape of HCV genotype 1-6 culture viruses**  
23 **treated with telaprevir and boceprevir.** Huh7.5 cells were infected with recombinant viruses with  
24 the NS3P/NS4A of genotype(isolate): 1a(TN) (1), 2a(JFH1) (2), 2a(J6) (3), 3a(S52) (3), 3a(452)  
25 (3), 4a(ED43) (4), 5a(SA13) (3), and 6a(HK6A) (3). Treatment with either telaprevir (TVR) or  
26 boceprevir (BOC) was initiated when ~10-60% of culture cells were infected, as estimated by  
27 HCV-immunostaining. Cell cultures were treated three times per week, when cells were split, with  
28 0.75-, 1-, 2-, 4-, 16-, or 64-fold EC50. The following specific EC50 (nM) values, determined in 48  
29 h high throughput treatment assays (3,5), were used to calculate treatment concentrations for  
30 telaprevir and boceprevir, respectively: 109 and 128 for 1a(TN), 516 and 623 for 2a(JFH1), 844 and  
31 1094 for 2a(J6), 3367 and 1435 for 3a(S52), 10393 and 2151 for 3a(452), 2159 and 1387 for  
32 4a(ED43), 1202 and 933 for 5a(SA13), and 454 and 679 for 6a(HK6a) (1,3,4) (unpublished). Non-  
33 treated control cultures were followed until viruses spread to  $\geq 80\%$  of culture cells. Treated cultures  
34 were followed until the peak in the percentage of HCV-positive culture cells was observed  
35 (typically  $\geq 50\%$ ), potentially representing viral escape, or until no HCV-positive cells were  
36 identified in six consecutive immunostainings, defined as viral suppression. For cultures showing  
37 viral spread, the first day following initiation of treatment with  $\geq 80\%$  (non-treated cultures) or  
38  $\geq 50\%$  (treated cultures) HCV-positive cells is reported. For 2a(JFH1) and 3a(452) cultured with 2-  
39 fold EC50 of boceprevir, and 6a(HK6a) cultured with 0.75-fold EC50 of telaprevir, viral spread to  
40 only 40% of culture cells was observed and was followed by a decrease in the percentage of HCV-  
41 positive cells. For cultures showing viral suppression, the first day following initiation of treatment  
42 with no HCV-positive cells is reported. The culture infected with 4a(ED43) treated with 4-fold  
43 EC50 of boceprevir was stopped at day 80 following initiation of treatment despite the presence of  
44 few HCV-positive cells. Data shown in this graph were not necessarily obtained from the same  
45 experiment. \*, fold EC50 of telaprevir not tested due to cytotoxicity.

46

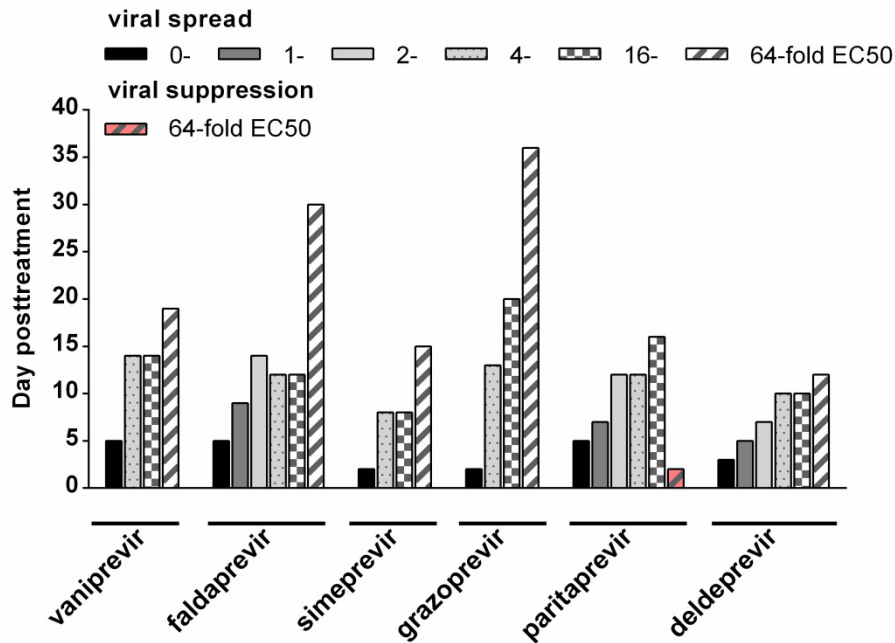

48 **Supplementary Figure S3. Induction of viral escape of HCV genotype 2a culture virus treated**  
 49 **with newer PIs.** Huh7.5 cells were infected with 2a(JFH1) (2) recombinant virus and treatment  
 50 with newer PIs was initiated when ~1-20% of culture cells were infected, as determined by HCV-  
 51 immunostaining. Cell cultures were treated three times per week when cells were split, with 4-, 16-,  
 52 or 64-fold EC50 of vaniprevir, simeprevir, and grazoprevir, and with 1-, 2-, 4-, 16-, or 64-fold  
 53 EC50 of faldaprevir, paritaprevir, and deldeprevir. The following specific EC50 (nM) values,  
 54 determined in 48 h high throughput treatment assays (3,5), were used to calculate treatment  
 55 concentrations: 24 nM for vaniprevir, 73 nM for simeprevir, 16 nM for grazoprevir, 50 nM for  
 56 faldaprevir, 38 nM for paritaprevir, and 13 nM for deldeprevir (3,6) (unpublished). Non-treated  
 57 control cultures were followed until viruses spread to  $\geq 80\%$  of culture cells. Treated cultures were  
 58 followed until the peak in the percentage of HCV-positive culture cells was observed (typically  
 59  $\geq 50\%$ ), potentially representing viral escape, or until no HCV-positive cells were identified in six  
 60 consecutive immunostainings, defined as viral suppression. For cultures showing viral spread, the  
 61 first day following initiation of treatment with  $\geq 80\%$  (non-treated cultures) or  $\geq 50\%$  (treated  
 62 cultures) HCV-positive cells is reported. For cultures showing viral suppression, the first day

63 following initiation of treatment with no HCV-positive cells is reported. Data shown in this graph  
64 was not necessarily obtained from the same experiment.

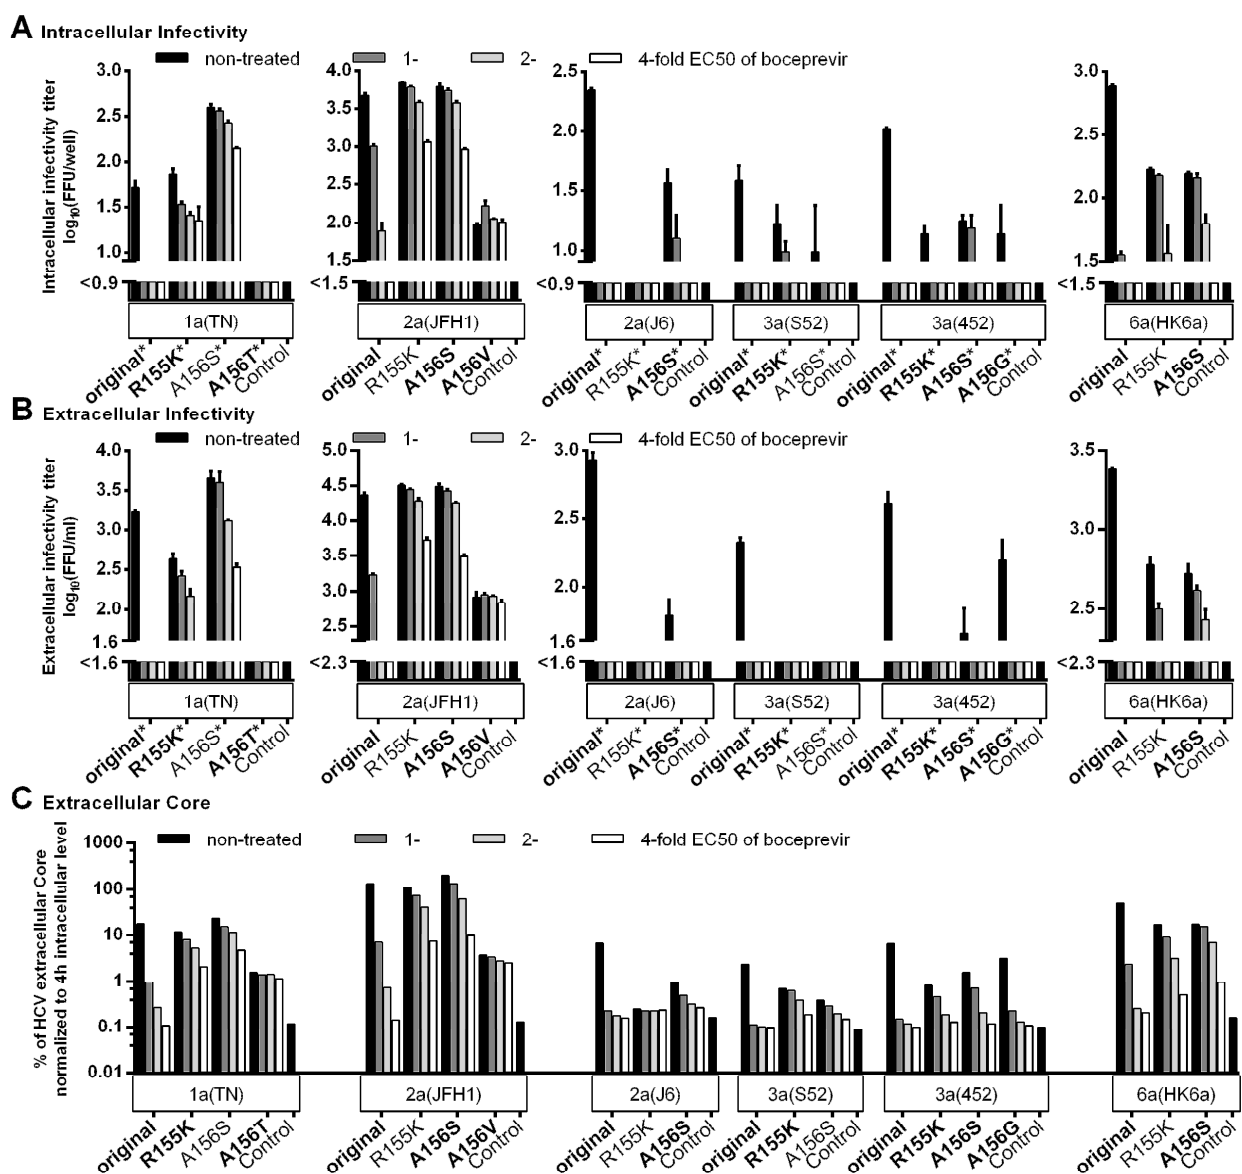

65 **Supplementary Figure S4. Boceprevir treatment resulted in decreased viral replication across**  
 66 **multiple HCV genotypes, which was rescued by key resistance substitutions at NS3P positions**  
 67 **155 and 156.** RNA transcripts from the indicated 1a(TN)-, 2a(JFH1)-, 2a(J6)-, 3a(S52)-, 3a(452)-,  
 68 and 6a(HK6a)-recombinants were transfected into S29 cells and 4 h later, cultures were treated with  
 69 the indicated concentrations of boceprevir. Intracellular (IC) (A) and extracellular (EC) (B)  
 70 infectivity titers and EC Core levels (C) were determined as described in Materials and Methods.  
 71 To account for possible differences in transfection efficiency, EC Core concentrations at 48 h were  
 72 normalized to IC Core concentrations at 4 h. The 4a(ED43) and 5a(SA13) recombinants were not

73 evaluated due to low levels of replication in S29 cells. Transfections of recombinants of the same  
74 genotype(isolate) were done in the same experiment.

75 Control indicates the replication-deficient 2a(JFH1)GND negative control virus, which was  
76 included in each transfection experiment. For this control, EC Core concentrations at 48 h ranged  
77 from 17.5 to 131.8 fmol/L. The values shown were normalized to 4 h IC Core values as described  
78 for NS3P variants.

79 The breaks in the y-axis indicate the lower cut-off (LOC) of the infectivity titration assay. For  
80 automated counting of FFUs, the LOC for IC and EC infectivity titers was  $1.5 \log_{10}(\text{FFU}/\text{well})$  and  
81  $2.3 \log_{10}(\text{FFU}/\text{ml})$ , respectively. In instances where low replication efficiency in S29 cells  
82 precluded automated counting, FFUs were counted manually, and the resulting titers are indicated  
83 with an asterisk (\*). The LOC for infectivity titers derived from manually counted FFUs was  $0.9$   
84  $\log_{10}(\text{FFU}/\text{well})$  for IC titers and  $1.6 \log_{10}(\text{FFU}/\text{ml})$  for EC titers. Of note, EC infectivity titers  
85 might be affected by residual amounts of PI in culture supernatant, especially for less fit  
86 recombinants.

87 The NS3P substitutions in bold were specifically selected for in the indicated virus under PI  
88 treatment in the current study (Figure 1).

89 IC Core levels determined in these experiments are shown in Figure 3.

90

### Combination at positions 36 and 155

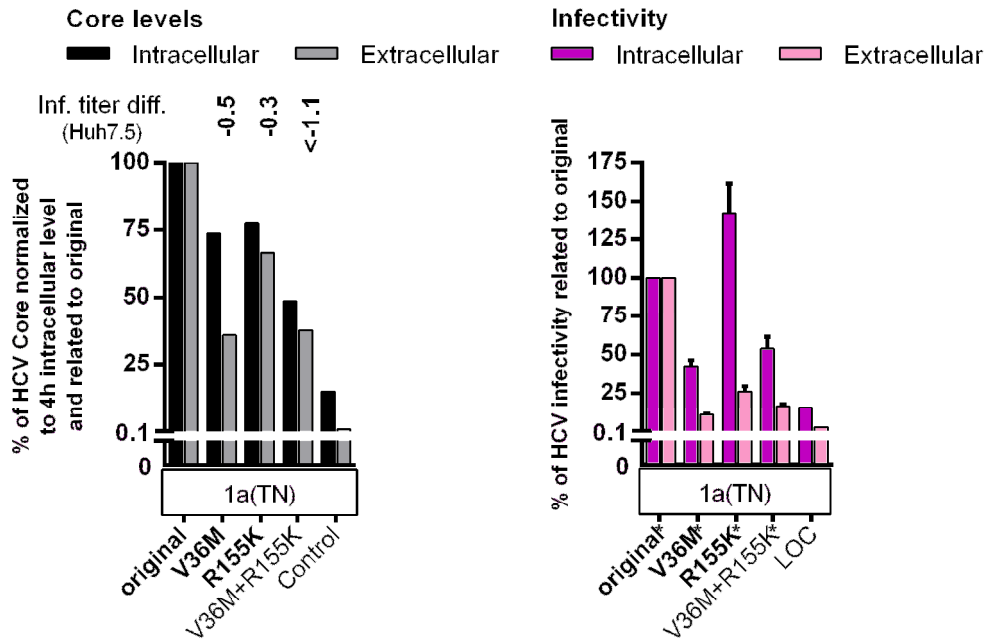

92 **Supplementary Figure S5. Combination of the substitutions V36M and R155K and fitness in**  
 93 **the context of the full viral life cycle.** The effect of the combination of V36M+R155K  
 94 substitutions on the viral life cycle was studied by transfection of RNA transcripts from the  
 95 indicated 1a(TN) recombinants into S29 cells, followed by the determination of intracellular (IC)  
 96 and extracellular (EC) Core concentrations and infectivity titers as described in Materials and  
 97 Methods. To account for possible differences in transfection efficiency, IC and EC Core  
 98 concentrations at 48 h were normalized to IC Core concentrations at 4 h. To determine the effect of  
 99 the indicated NS3P substitutions on viral fitness, normalized Core values and infectivity titers of  
 100 variants were related to values of the respective original recombinants (original).  
 101 Control indicates the replication-deficient 2a(JFH1)GND negative control virus. For this control, IC  
 102 Core concentrations at 48 h ranged from  $9.4 \times 10^3$  to  $25.0 \times 10^3$  fmol/L, and EC Core  
 103 concentrations at 48 h ranged from 17.5 to 131.8 fmol/L. The values shown were normalized to the  
 104 IC Core concentrations at 4 h and related to the values obtained for the respective original  
 105 recombinants (original) as was described for the NS3P-variants.



106 LOC indicates the lower cut-off of the infectivity titration assay. FFUs were counted manually, and  
107 the resulting titers are indicated with an asterisk (\*). The LOC for infectivity titers derived from  
108 manually counted FFUs was  $0.9 \log_{10}(\text{FFU/well})$  for IC titers and  $1.6 \log_{10}(\text{FFU/ml})$  for EC titers.  
109 LOC values were related to the values obtained for the respective original recombinants (original)  
110 as described for NS3P variants.

111 The NS3P substitutions in bold were specifically selected for in the indicated virus under PI  
112 treatment in the current study (Figure 1 and Supplementary Table S2). For comparison, titer  
113 differences (Inf. titer diff.) observed following transfection of Huh7.5 cells are indicated above each  
114 variant. Titer differences were calculated using the titers determined in this study (Table 1) as  
115 described in Materials and Methods.

116

## A Grazoprevir (MK-5172)

### Extracellular Core levels

■ non-treated    ■ 0.5-    ■ 2-    ■ 4-fold EC50 of MK-5172

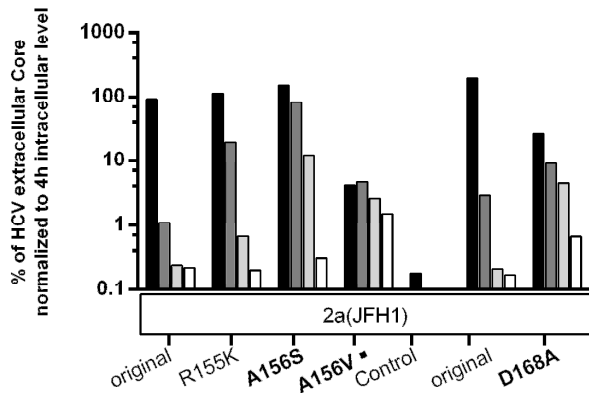

### Extracellular Infectivity

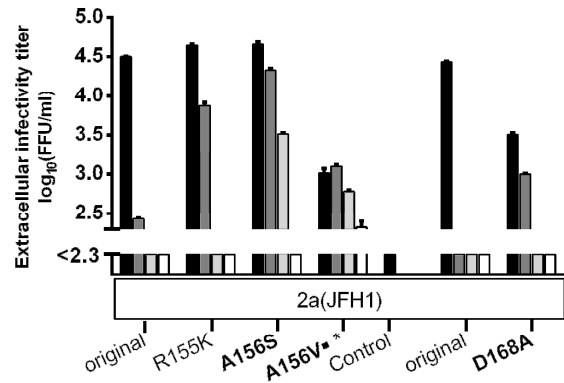

## B Paritaprevir (ABT-450)

### Extracellular Core levels

■ non-treated    ■ 1-    ■ 2-    ■ 4-fold EC50 of ABT-450

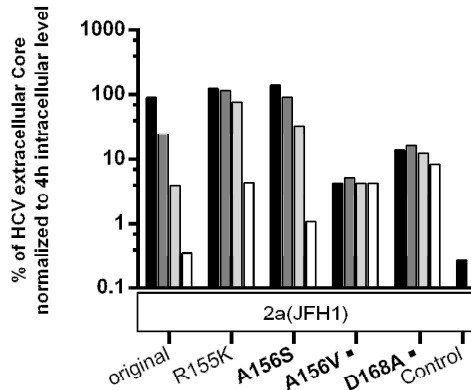

### Extracellular Infectivity

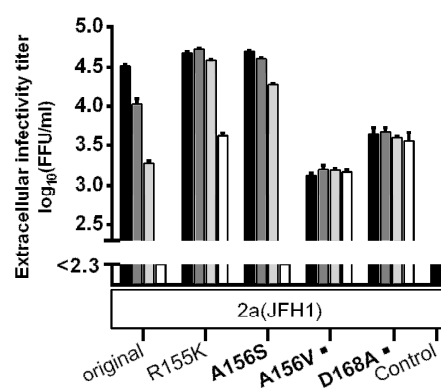

117 **Supplementary Figure S6. Key resistance substitutions at NS3P positions 155, 156 and 168**  
 118 **rescued 2a(JFH1) replication under treatment with newer PIs.** RNA transcripts from the  
 119 indicated 2a(JFH1)-recombinants were transfected into S29 cells and 4 h later, cultures were treated  
 120 with the indicated concentrations of grazoprevir (MK-5172) (A) or paritaprevir (ABT-450) (B).  
 121 Extracellular (EC) Core concentrations and infectivity titers were determined as described in  
 122 Materials and Methods. To account for possible differences in transfection efficiency, EC Core  
 123 concentrations at 48 h were normalized to IC Core concentrations at 4 h. Transfections of  
 124 recombinants treated with paritaprevir were done in the same experiment. Transfections of

125 recombinants treated with grazoprevir were done in two different experiments. For each  
126 experiment, the original 2a(JFH1) recombinant was included.

127 Control indicates the replication-deficient 2a(JFH1)GND negative control virus. For this control,  
128 EC Core concentrations at 48 h ranged from 17.5 to 131.8 fmol/L. The values shown were  
129 normalized to 4 h IC Core values as described for the NS3P variants.

130 The breaks in the y-axis indicate the lower cut-off (LOC) of the infectivity titration assay. For  
131 automated counting of FFUs, the LOC for EC infectivity titers was  $2.3 \log_{10}(\text{FFU/ml})$ . For  
132 2a(JFH1)A156V treated with grazoprevir, low replication efficiency in S29 cells precluded  
133 automated counting. FFUs were counted manually, and the resulting titers are indicated with an  
134 asterisk (\*). The LOC for infectivity titers derived from manually counted FFUs was  $1.6$   
135  $\log_{10}(\text{FFU/ml})$  for EC titers.

136 NS3P substitutions in bold were specifically selected for in the indicated virus under PI treatment in  
137 the current study. ■, the substitution was identified in escape variants emerging under treatment  
138 with the PI used for treatment (Figure 2).

139 IC Core levels and infectivity titers determined in these experiments are shown in Figure 5.

140

**A Intracellular Infectivity**

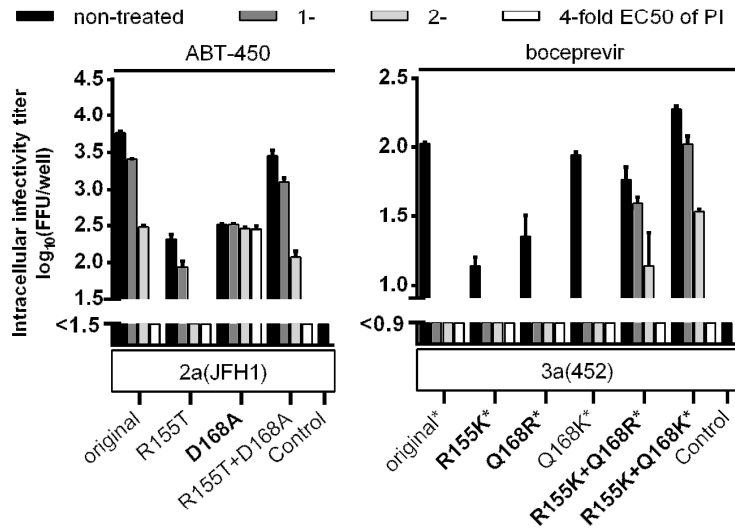

**B Extracellular Infectivity**

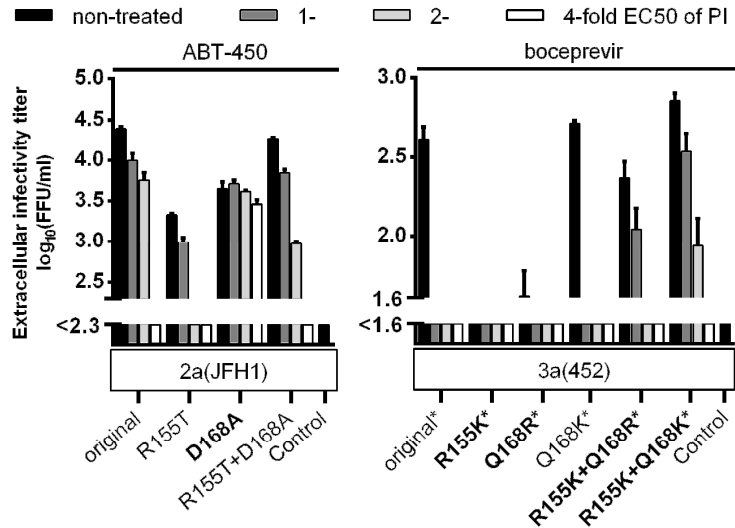

**C Extracellular Core**

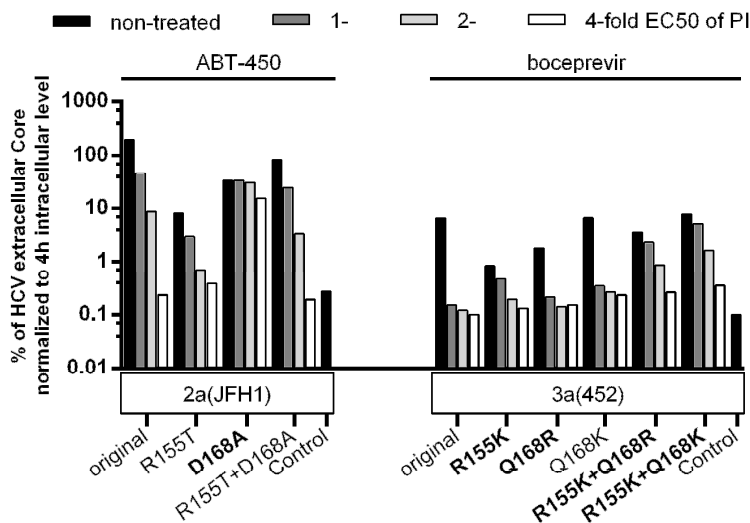

142 **Supplementary Figure S7. Combinations of substitutions at positions 155 and 168 increased**  
143 **viral fitness but not PI resistance.** RNA transcripts from the indicated 2a(JFH1)- and 3a(452)-  
144 recombinants were transfected into S29 cells. Four 4 h later, cultures were treated with the indicated  
145 concentrations of paritaprevir (ABT-450) or boceprevir. Intracellular (IC) (A) and extracellular  
146 (EC) (B) infectivity titers and EC Core levels (C) were determined as described in Materials and  
147 Methods. To account for possible differences in transfections efficiency, EC Core values were  
148 normalized to IC Core concentrations at 4 h. Transfections of recombinants of the same  
149 genotype(isolate) were done in the same experiment.

150 Control indicates the replication-deficient 2a(JFH1)GND negative control virus. For this control,  
151 EC Core concentrations at 48 h ranged from 17.5 to 131.8 fmol/L. The values shown were  
152 normalized to 4 h IC Core values as described for NS3P variants.

153 The breaks in the y-axis indicate the lower cut-off (LOC) of the infectivity titration assay. For  
154 automated counting of FFUs, the LOC for IC and EC infectivity titers was up to 1.5  
155  $\log_{10}(\text{FFU/well})$  and 2.3  $\log_{10}(\text{FFU/ml})$ , respectively. In instances where low replication efficiency  
156 in S29 cells precluded automated counting, FFUs were counted manually, and the resulting titers  
157 are indicated with an asterisk (\*). The LOC for infectivity titers derived from manually counted  
158 FFUs was 0.9  $\log_{10}(\text{FFU/well})$  for IC titers and 1.6  $\log_{10}(\text{FFU/ml})$  for EC titers. Of note, EC  
159 infectivity titers (B) might be affected by residual amounts of PI in culture supernatant, especially  
160 for less fit recombinants.

161 The NS3P substitutions in bold were specifically selected in the indicated virus under PI treatment  
162 in the current study (Figures 1 and 2, Supplementary Tables S14 and S22).

163 IC Core levels determined in these experiments are shown in Figure 6.

164

165 **Supplementary Table S1.** Primers and conditions used for the amplification of NS3-NS4A from  
 166 HCV genotypes 1-6

| Primer name                                                                    | Sequence (5' → 3')                          | H77 abs ref <sup>a</sup> (5' → 3') |
|--------------------------------------------------------------------------------|---------------------------------------------|------------------------------------|
| <b>2a(JFH1), 2a(J6), 3a(S52), 3a(452), 5a(SA13), and 6a(HK6a) recombinants</b> |                                             |                                    |
| <b>Reverse transcription</b>                                                   |                                             |                                    |
| 9470R(24)_JFH1                                                                 | CTATGGAGTGACCTAGTGTGTGC                     | 9405-9382                          |
| <b>First round PCR</b>                                                         |                                             |                                    |
| JF3365                                                                         | CRACTTGGTCGGGAGGTCC                         | 3354-3372                          |
| JFH15548                                                                       | GATCTTGGACTTCAACATCTCGGCTATC                | 5537-5510                          |
| <b>Second round PCR</b>                                                        |                                             |                                    |
| JF3382                                                                         | CCTCCTTGGCCAGCTGATGG                        | 3371-3391                          |
| JFH1R5520                                                                      | CGCTGCCCTCTTCGATGAG                         | 5509-5488                          |
| <b>1a(TN) full-length recombinant</b>                                          |                                             |                                    |
| <b>Reverse transcription</b>                                                   |                                             |                                    |
| H9417R                                                                         | CGTCTCTAGACAGGAAATGGCTTAAGAGGCCGGAGTGTTTACC | 9417-9385                          |
| <b>First round PCR</b>                                                         |                                             |                                    |
| 1aF3321                                                                        | GGTGACATCATCAACGGCTTGC                      | 3321-3342                          |
| 1aR5541                                                                        | CGAGGGCCTTCTGCTTGAAGTGC                     | 5541-5520                          |
| <b>Second round PCR</b>                                                        |                                             |                                    |
| 1aF3391                                                                        | GAATGGTCTCCAAGGGGTGGAG                      | 3391-3412                          |
| 1aR5511                                                                        | GCATCATCCCTTGCTCGATGTACG                    | 5511-5488                          |
| <b>4a(ED43) 5'UTR-NS5A recombinant</b>                                         |                                             |                                    |
| <b>Reverse transcription</b>                                                   |                                             |                                    |
| 9470R(24)_JFH1                                                                 | CTATGGAGTGACCTAGTGTGTGC                     | 9405-9382                          |
| <b>First round PCR</b>                                                         |                                             |                                    |
| ED43F3335                                                                      | GGATTACCTGTTTCGGCCAGGTTGG                   | 3336-3360                          |
| ED43R5564                                                                      | GCTTGCCAGCGAAATTTAGGAGACC                   | 5565-5541                          |
| <b>Second round PCR</b>                                                        |                                             |                                    |
| ED43F3360                                                                      | GCAATGAAATCTTGCTCGGACCAGC                   | 3361-3385                          |
| ED43R5528                                                                      | GCTTGAAGTCTCAGCCAGTTGTAACC                  | 5529-5503                          |

167  
 168 PCR was carried out using BD Advantage 2 Polymerase Mix (Clontech). Cycling conditions for the  
 169 first round PCR were 99°C for 35s, followed by 35 cycles of 99°C for 35s, 67°C for 30s and 68°C  
 170 for 6min, and a final elongation step at 68°C for 8min. Cycling conditions for second round nested  
 171 PCR were similar, except the annealing temperature was decreased to 60°C. For 1a(TN), the  
 172 annealing temperature used was 67°C in both first and second round PCR.

173 *a* Primer 5' to 3' binding sites are numbered relative to the H77(AF009606) reference sequence.

**Supplementary Table S2.** Nucleotide changes identified in the NS3P of 1a(TN) at the time of viral escape under telaprevir treatment

| Nucleotide position <sup>a</sup>        |                  |                  |      |      |      |      |      |      |      |      |      |      |      |      |      |      |                                 |
|-----------------------------------------|------------------|------------------|------|------|------|------|------|------|------|------|------|------|------|------|------|------|---------------------------------|
| 1a(TN) plasmid                          |                  | 3433             | 3525 | 3526 | 3544 | 3552 | 3579 | 3583 | 3604 | 3630 | 3661 | 3796 | 3874 | 3883 | 3885 | 3927 |                                 |
| H77 rel ref                             |                  | 14               | 106  | 107  | 125  | 133  | 160  | 164  | 185  | 211  | 242  | 377  | 455  | 464  | 466  | 508  |                                 |
| H77 abs ref                             |                  | 3433             | 3525 | 3526 | 3544 | 3552 | 3579 | 3583 | 3604 | 3630 | 3661 | 3796 | 3874 | 3883 | 3885 | 3927 |                                 |
| 1a(TN) nucleotide identity <sup>b</sup> |                  |                  |      |      |      |      |      |      |      |      |      |      |      |      |      |      |                                 |
|                                         |                  | C                | G    | T    | C    | G    | A    | T    | G    | G    | A    | T    | G    | G    | G    | A    |                                 |
| Fold EC <sub>50</sub> <sup>c</sup>      | Exp <sup>d</sup> | Day <sup>e</sup> |      |      |      |      |      |      |      |      |      |      |      |      |      |      | Subclonal analysis <sup>f</sup> |
| <i>NT</i>                               | 1                | 4                | •    | •    | •    | •    | •    | •    | •    | •    | •    | •    | •    | •    | •    | •    | •                               |
| <i>NT</i>                               | 1                | 6                | •    | •    | •    | •    | •    | •    | •    | •    | •    | •    | •    | •    | •    | •    | •                               |
| <i>0.75x</i>                            | 1                | 9                | •    | •    | •    | •    | •    | •    | •    | •    | •    | •    | •    | •    | •    | •    | •                               |
| <i>0.75x</i>                            | 1                | 11               | •    | •    | •    | •    | •    | •    | •    | •    | •    | •    | •    | •    | •    | •    | •                               |
| <i>1x</i>                               | 1                | 9                | •    | •    | •    | •    | G/a  | •    | C    | •    | •    | A/g  | •    | •    | •    | •    | •                               |
| <i>1x</i>                               | 1                | 11               | •    | •    | •    | •    | •    | •    | •    | •    | •    | •    | •    | •    | •    | •    | •                               |
| <i>2x</i>                               | 1                | 16               | •    | •    | •    | •    | •    | •    | T/C  | •    | •    | •    | •    | •    | •    | •    | •                               |
| <i>2x</i>                               | 1                | 18               | C/g  | •    | •    | •    | •    | A/G  | T/c  | •    | G/a  | •    | •    | •    | •    | •    | •                               |
| <i>4x</i>                               | 1                | 16               | •    | •    | •    | •    | •    | •    | T/C  | •    | •    | •    | T/c  | G/c  | •    | •    | •                               |
| <i>4x</i>                               | 1                | 18               | •    | •    | •    | •    | •    | A/G  | •    | •    | •    | •    | •    | •    | •    | •    | •                               |
| <i>16x</i>                              | 1                | 30               | •    | G/A  | T/c  | •    | •    | G    | •    | •    | •    | •    | •    | •    | •    | •    | •                               |
| <i>16x</i>                              | 1                | 32               | •    | G/A  | •    | •    | •    | G    | •    | •    | •    | •    | T/c  | •    | G/A  | •    | •                               |
| <i>64x</i>                              | 1                | 62               | •    | •    | •    | A    | •    | •    | •    | •    | •    | •    | •    | •    | •    | A    | A/g                             |
| <i>64x</i>                              | 1                | 65               | •    | •    | •    | A    | •    | •    | •    | G/a  | •    | •    | •    | •    | •    | A    | •                               |
| Amino acid position <sup>g</sup>        |                  |                  |      |      |      |      |      |      |      |      |      |      |      |      |      |      |                                 |
| H77 rel ref                             |                  | 5                | 36   | 36   | 42   | 45   | 54   | 55   | 62   | 71   | 81   | 126  | 152  | 155  | 156  | 170  |                                 |
| H77 abs ref                             |                  | 1031             | 1062 | 1062 | 1068 | 1071 | 1080 | 1081 | 1088 | 1097 | 1107 | 1152 | 1178 | 1181 | 1182 | 1196 |                                 |
| 1a(TN) amino acid change <sup>h</sup>   |                  |                  |      |      |      |      |      |      |      |      |      |      |      |      |      |      |                                 |
|                                         |                  | A→G              | V→M  | V→A  | T→N  | A→T  | T→A  | V→A  | R→K  | V→I  | D→G  | L→P  | G→A  | R→K  | A→T  | I→V  |                                 |

T54A (1); V36M+T54A (1);  
V36M+T54A+R155K (2); T54A+R155K (10)

NS3P sequences were obtained from viruses in supernatants from PI treated or non-treated cultures (NT) at the peak of infection of the escape experiment (Supplementary Figure S2).



- a* Nucleotide positions are numbered according to the given recombinant genome or relative to the H77(AF009606) reference sequence, as specified.
- b* Nucleotide identity at the respective position of the original recombinant or of viral genomes recovered from infected cell cultures. Coding mutations identified by nucleotide changes that were detected as minor or major variants in at least one time point are shown. The amino acid substitutions estimated to be present in at least 50% of viral genomes are indicated by capital letters, while amino acid substitutions estimated to be present in a minor percentage of viral genomes are indicated by lowercase letters. Dots indicate that the nucleotide at the specified position was conserved.
- c* Fold EC50 of PI under which the indicated nucleotide changes identified at viral escape were selected. EC50 values of the original viruses were previously determined and are indicated in Supplementary Figure S2.
- d* Experimental identifier of the escape experiment from which the reported sequence is derived.
- e* Sequences were from the indicated day following initiation of treatment at which peak infection was observed.
- f* Subclonal analysis was done as described in the Materials and Methods; typically ~10 clones were analysed. The individual substitutions or combinations of substitutions are shown with the number of identified clones in parentheses. Original, indicates clones for which none of the specified NS3 protease mutations were seen.
- g* Amino acid positions are numbered relative to the H77(AF009606) reference strain.
- h* Amino acid changes encoded by the given nucleotide changes are indicated.

**Supplementary Table S3.** Nucleotide changes identified in the NS3P of 2a(JFH1) at the time of viral escape under telaprevir treatment

| Nucleotide position <sup>a</sup>          |                  |                  |      |      |      |      |      |      |      |      |      |                  |                  |      |      |                                 |                                                   |
|-------------------------------------------|------------------|------------------|------|------|------|------|------|------|------|------|------|------------------|------------------|------|------|---------------------------------|---------------------------------------------------|
| 2a(JFH1) plasmid                          |                  | 3449             | 3465 | 3548 | 3573 | 3575 | 3590 | 3630 | 3639 | 3710 | 3798 | 3896             | 3897             | 3938 | 3953 |                                 |                                                   |
| H77 rel ref                               |                  | 19               | 35   | 118  | 143  | 145  | 160  | 200  | 209  | 280  | 368  | 466              | 467              | 508  | 523  |                                 |                                                   |
| H77 abs ref                               |                  | 3438             | 3454 | 3537 | 3562 | 3564 | 3579 | 3619 | 3628 | 3699 | 3787 | 3885             | 3886             | 3927 | 3942 |                                 |                                                   |
| 2a(JFH1) nucleotide identity <sup>b</sup> |                  |                  |      |      |      |      |      |      |      |      |      |                  |                  |      |      |                                 |                                                   |
|                                           |                  | G                | G    | T    | T    | T    | A    | T    | C    | T    | G    | G                | C                | A    | C    |                                 |                                                   |
| Fold EC <sub>50</sub> <sup>c</sup>        | Exp <sup>d</sup> | Day <sup>e</sup> |      |      |      |      |      |      |      |      |      |                  |                  |      |      | Subclonal analysis <sup>f</sup> |                                                   |
| <i>NT</i>                                 | 1                | 4                | •    | •    | •    | •    | •    | •    | •    | C/g  | T/g  | •                | •                | •    | •    | •                               |                                                   |
| <i>NT</i>                                 | 1                | 6                | •    | •    | •    | •    | •    | •    | •    | •    | •    | •                | •                | •    | •    | •                               |                                                   |
| <i>NT</i>                                 | 2                | 5                | •    | •    | •    | •    | •    | •    | •    | •    | •    | •                | •                | •    | •    | •                               |                                                   |
| <i>NT</i>                                 | 2                | 7                | •    | G/a  | •    | •    | •    | •    | •    | •    | •    | •                | •                | •    | •    | •                               |                                                   |
| <i>0.75x</i>                              | 2                | 12               | G/a  | •    | •    | •    | •    | •    | •    | •    | •    | •                | •                | •    | •    | •                               |                                                   |
| <i>0.75x</i>                              | 2                | 14               | •    | •    | T/a  | T/a  | T/a  | A/g  | •    | •    | •    | •                | •                | •    | A/G  | •                               | T54A (1); I170V (5); T54A+I170V (1); original (3) |
| <i>1x</i>                                 | 2                | 12               | •    | •    | T/a  | T/a  | T/a  | A/g  | •    | •    | •    | g/A              | •                | •    | •    | C/t                             |                                                   |
| <i>1x</i>                                 | 2                | 14               | •    | •    | T/a  | T/a  | T/a  | A/g  | •    | •    | •    | •                | •                | •    | •    | •                               |                                                   |
| <i>2x</i>                                 | 2                | 16               | •    | •    | •    | •    | •    | A/g  | •    | •    | •    | •                | g/T              | •    | •    | •                               | T54A (3); A156S (5); original (2)                 |
| <i>2x</i>                                 | 2                | 19               | •    | •    | •    | •    | •    | •    | •    | •    | •    | •                | T                | •    | •    | •                               |                                                   |
| <i>4x</i>                                 | 1                | 15               | •    | •    | •    | •    | •    | •    | •    | •    | •    | •                | G/t              | c/T  | •    | •                               |                                                   |
| <i>4x</i>                                 | 1                | 18               | •    | •    | •    | •    | •    | •    | •    | •    | •    | •                | •                | c/T  | •    | •                               |                                                   |
| <i>16x</i>                                | 1                | 15               | •    | •    | •    | •    | •    | •    | •    | •    | •    | •                | •                | T    | •    | •                               |                                                   |
| <i>16x</i>                                | 1                | 18               | •    | •    | •    | •    | •    | •    | T/c  | •    | •    | •                | •                | T    | •    | •                               |                                                   |
| Amino acid position <sup>g</sup>          |                  |                  |      |      |      |      |      |      |      |      |      |                  |                  |      |      |                                 |                                                   |
| H77 rel ref                               |                  | 7                | 12   | 40   | 48   | 49   | 54   | 67   | 70   | 94   | 123  | 156              | 170              | 175  |      |                                 |                                                   |
| H77 abs ref                               |                  | 1033             | 1038 | 1066 | 1074 | 1075 | 1080 | 1093 | 1096 | 1120 | 1149 | 1182             | 1196             | 1201 |      |                                 |                                                   |
| 2a(JFH1) amino acid change <sup>h</sup>   |                  |                  |      |      |      |      |      |      |      |      |      |                  |                  |      |      |                                 |                                                   |
|                                           |                  | A→T              | G→D  | S→T  | I→N  | S→T  | T→A  | L→S  | P→R  | L→V  | R→Q  | A→S <sup>i</sup> | A→V <sup>i</sup> | I→V  | L→F  |                                 |                                                   |

For details, see footnote of Supplementary Table S2.

*i*, 2a(JFH1) nucleotide positions 3896 and 3897 are in the the same codon; indicated nucleotide changes encode the indicated amino acid changes at amino acid position 156.

**Supplementary Table S4.** Nucleotide changes identified in the NS3P of 2a(J6) at the time of viral escape under telaprevir treatment

| Nucleotide position <sup>a</sup>        |                    |                  |      |      |      |      |   |                                                   |
|-----------------------------------------|--------------------|------------------|------|------|------|------|---|---------------------------------------------------|
| 2a(J6) plasmid                          | 3590               | 3689             | 3723 | 3762 | 3896 | 3959 |   |                                                   |
| H77 rel ref                             | 160                | 259              | 293  | 332  | 466  | 529  |   |                                                   |
| H77 abs ref                             | 3579               | 3678             | 3712 | 3751 | 3885 | 3948 |   |                                                   |
| 2a(J6) nucleotide identity <sup>b</sup> |                    |                  |      |      |      |      |   |                                                   |
|                                         | A                  | A                | C    | C    | G    | A    |   |                                                   |
| Fold EC <sub>50</sub> <sup>c</sup>      | Exp <sup>d</sup>   | Day <sup>e</sup> |      |      |      |      |   | Subclonal analysis <sup>f</sup>                   |
| <i>NT</i>                               | 1                  | 2                | •    | •    | C/a  | •    | • | •                                                 |
| <i>NT</i>                               | 1                  | 4                | •    | •    | C/A  | •    | • | •                                                 |
| <i>NT</i>                               | 2                  | 4                | •    | •    | C/a  | •    | • | •                                                 |
| <i>NT</i>                               | 2                  | 6                | •    | A/c  | •    | •    | • | •                                                 |
| <i>0.75x</i>                            | 2                  | 13               | A/g  | •    | C/A  | •    | • | A/g                                               |
| <i>0.75x</i>                            | 2                  | 15               | A/g  | •    | C/A  | •    | • | A/g                                               |
| <i>1x</i>                               | 1                  | 15               | A/G  | •    | C/A  | •    | • | •                                                 |
| <i>1x</i>                               | 1                  | 20               | A/G  | •    | C/A  | •    | • | •                                                 |
| <i>2x</i>                               | 2                  | 24               | G    | •    | c/A  | •    | • | A/g                                               |
| <i>2x</i>                               | 2                  | 26               | a/G  | •    | A    | •    | • | •                                                 |
| <i>4x</i>                               | 1                  | 74               | A/t  | •    | •    | C/t  | T | G                                                 |
| <i>4x</i>                               | 1                  | 76               | A/t  | •    | •    | •    | T | a/G                                               |
|                                         |                    |                  |      |      |      |      |   | A156S (2); A156S+I177V (10); T54S+A156S+I177V (1) |
| Amino acid position <sup>g</sup>        |                    |                  |      |      |      |      |   |                                                   |
| H77 rel ref                             | 54                 | 87               | 98   | 111  | 156  | 177  |   |                                                   |
| H77 abs ref                             | 1080               | 1113             | 1124 | 1137 | 1182 | 1203 |   |                                                   |
| 2a(J6) amino acid change <sup>h</sup>   |                    |                  |      |      |      |      |   |                                                   |
|                                         | T→A/S <sup>i</sup> | S→R              | T→K  | A→V  | A→S  | I→V  |   |                                                   |

For details, see footnote of Supplementary Table S2.

*i*, A3590G results in T54A; A3590T results in T54S.

**Supplementary Table S5.** Nucleotide changes identified in the NS3P of 3a(S52) at the time of viral escape under telaprevir treatment

| Nucleotide position <sup>a</sup>         |                  |                  |      |      |      |      |     |                                                 |
|------------------------------------------|------------------|------------------|------|------|------|------|-----|-------------------------------------------------|
| 3a(S52) plasmid                          |                  | 3590             | 3660 | 3666 | 3722 | 3894 |     |                                                 |
| H77 rel ref                              |                  | 160              | 230  | 236  | 292  | 464  |     |                                                 |
| H77 abs ref                              |                  | 3579             | 3649 | 3655 | 3711 | 3883 |     |                                                 |
| 3a(S52) nucleotide identity <sup>b</sup> |                  | A                | A    | A    | G    | G    |     |                                                 |
| Fold EC <sub>50</sub> <sup>c</sup>       | Exp <sup>d</sup> | Day <sup>e</sup> |      |      |      |      |     | Subclonal analysis <sup>f</sup>                 |
| <i>NT</i>                                | 1                | 4                | •    | •    | •    | •    | •   |                                                 |
| <i>NT</i>                                | 1                | 6                | •    | •    | •    | •    | •   |                                                 |
| <i>NT</i>                                | 2                | 4                | •    | •    | •    | •    | •   |                                                 |
| <i>NT</i>                                | 2                | 6                | •    | •    | •    | •    | •   |                                                 |
| <i>0.75x</i>                             | 2                | 22               | •    | •    | •    | •    | •   |                                                 |
| <i>0.75x</i>                             | 2                | 29               | •    | •    | G    | •    | •   |                                                 |
| <i>1x</i>                                | 1                | 22               | A/G  | A/g  | •    | G/a  | •   | T54A (1); A98T (3); T54A+A98T (3); original (2) |
| <i>1x</i>                                | 1                | 28               | A/G  | A/g  | •    | G/a  | •   |                                                 |
| <i>2x</i>                                | 2                | 27               | •    | a/G  | •    | •    | •   |                                                 |
| <i>2x</i>                                | 2                | 29               | •    | G    | •    | •    | •   |                                                 |
| <i>4x</i>                                | 1                | 31               | •    | A/g  | •    | G/a  | g/A |                                                 |
| <i>4x</i>                                | 1                | 33               | •    | A/g  | •    | G/a  | g/A | R155K (10); original (1)                        |
| Amino acid position <sup>g</sup>         |                  |                  |      |      |      |      |     |                                                 |
| H77 rel ref                              |                  | 54               | 77   | 79   | 98   | 155  |     |                                                 |
| H77 abs ref                              |                  | 1080             | 1103 | 1105 | 1124 | 1181 |     |                                                 |
| 3a(S52) amino acid change <sup>h</sup>   |                  | T→A              | N→S  | D→G  | A→T  | R→K  |     |                                                 |

For details, see footnote of Supplementary Table S2.

**Supplementary Table S6.** Nucleotide changes identified in the NS3P of 3a(452) at the time of viral escape under telaprevir treatment

| Nucleotide position <sup>a</sup>         |                  |                  |                                 |      |                      |
|------------------------------------------|------------------|------------------|---------------------------------|------|----------------------|
| 3a(452) plasmid                          |                  | 3894             | 3896                            | 3939 |                      |
| H77 rel ref                              |                  | 464              | 466                             | 509  |                      |
| H77 abs ref                              |                  | 3883             | 3885                            | 3928 |                      |
| 3a(452) nucleotide identity <sup>b</sup> |                  |                  |                                 |      |                      |
|                                          |                  | G                | G                               | T    |                      |
| Fold EC <sub>50</sub> <sup>c</sup>       | Exp <sup>d</sup> | Day <sup>e</sup> | Subclonal analysis <sup>f</sup> |      |                      |
| <i>NT</i>                                | 1                | 2                | •                               | •    | •                    |
| <i>NT</i>                                | 1                | 4                | •                               | •    | •                    |
| <i>NT</i>                                | 2                | 4                | •                               | •    | •                    |
| <i>NT</i>                                | 2                | 6                | •                               | •    | •                    |
| <i>0.75x</i>                             | 2                | 22               | •                               | G/T  | T/C                  |
| <i>0.75x</i>                             | 2                | 25               | •                               | G/T  | T/c                  |
| <i>1x</i>                                | 1                | 31               | G/A                             | G/T  | •                    |
| <i>1x</i>                                | 1                | 33               | G/A                             | G/T  | •                    |
|                                          |                  |                  |                                 |      | R155K (3); A156S (8) |
| <i>2x</i>                                | 2                | 42               | A                               | •    | •                    |
| <i>2x</i>                                | 2                | 48               | A                               | •    | •                    |
| Amino acid position <sup>g</sup>         |                  |                  |                                 |      |                      |
| H77 rel ref                              |                  | 155              | 156                             | 170  |                      |
| H77 abs ref                              |                  | 1181             | 1182                            | 1196 |                      |
| 3a(452) amino acid change <sup>h</sup>   |                  |                  |                                 |      |                      |
|                                          |                  | R→K              | A→S                             | I→T  |                      |

For details, see footnote of Supplementary Table S2.

**Supplementary Table S7.** Nucleotide changes identified in the NS3P of 4a(ED43) at the time of viral escape under telaprevir treatment

| Nucleotide position <sup>a</sup>          |                  |                  |      |      |      |      |      |      |      |      |      |     |
|-------------------------------------------|------------------|------------------|------|------|------|------|------|------|------|------|------|-----|
| 4a(ED43) plasmid                          |                  | 3459             | 3648 | 3683 | 3702 | 3734 | 3756 | 3812 | 3881 | 3884 | 3936 |     |
| H77 rel ref                               |                  | 41               | 230  | 265  | 284  | 316  | 338  | 395  | 463  | 466  | 518  |     |
| H77 abs ref                               |                  | 3460             | 3649 | 3684 | 3703 | 3735 | 3757 | 3814 | 3882 | 3885 | 3937 |     |
| 4a(ED43) nucleotide identity <sup>b</sup> |                  |                  | T    | A    | C    | C    | C    | T    | A    | C    | G    | A   |
| Fold EC <sub>50</sub> <sup>c</sup>        | Exp <sup>d</sup> | Day <sup>e</sup> |      |      |      |      |      |      |      |      |      |     |
| NT                                        | 1                | 4                | •    | •    | •    | •    | •    | •    | •    | •    | •    | •   |
| NT                                        | 1                | 7                | •    | •    | •    | •    | •    | •    | •    | •    | •    | •   |
| 0.75x                                     | 1                | 11               | T/g  | •    | •    | C/a  | C/a  | •    | •    | •    | •    | •   |
| 0.75x                                     | 1                | 16               | •    | •    | •    | •    | •    | •    | •    | •    | •    | •   |
| 1x                                        | 1                | 14               | •    | •    | •    | •    | •    | T/c  | •    | •    | •    | •   |
| 1x                                        | 1                | 16               | •    | •    | •    | •    | •    | •    | A/g  | •    | •    | •   |
| 2x                                        | 1                | 53               | •    | a/G  | •    | •    | •    | •    | A/g  | •    | G/t  | •   |
| 2x                                        | 1                | 58               | •    | A/G  | •    | •    | •    | •    | •    | •    | G/T  | •   |
| 4x                                        | 1                | 73               | •    | •    | C/g  | •    | •    | •    | •    | C/t  | T    | A/c |
| 4x                                        | 1                | 78               | •    | •    | •    | •    | •    | •    | •    | •    | T    | •   |
| Amino acid position <sup>f</sup>          |                  |                  |      |      |      |      |      |      |      |      |      |     |
| H77 rel ref                               |                  | 14               | 77   | 89   | 95   | 106  | 113  | 132  | 155  | 156  | 173  |     |
| H77 abs ref                               |                  | 1040             | 1103 | 1115 | 1121 | 1132 | 1139 | 1158 | 1181 | 1182 | 1199 |     |
| 4a(ED43) amino acid change <sup>g</sup>   |                  |                  | F→C  | N→S  | P→A  | A→D  | L→I  | V→A  | I→V  | R→C  | A→S  | E→A |

NS3P sequences were obtained from viruses in supernatants from PI treated or non-treated cultures (NT) at the peak of infection of the escape experiment (Supplementary Figure S2).

*a* Nucleotide positions are numbered according to the given recombinant genome or relative to the H77(AF009606) reference sequence, as specified.

*b* Nucleotide identity at the respective position of the original recombinant or of viral genomes recovered from infected cell cultures. Coding mutations identified by nucleotide changes that were detected as minor or major variants in at least one time point are shown. The amino acid substitutions estimated to be present in at least 50% of viral genomes are indicated by capital letters, while amino acid substitutions estimated to be present in a minor percentage of viral genomes are indicated by lowercase letters. Dots indicate that the nucleotide at the specified position was conserved.

*c* Fold EC50 of PI under which the indicated nucleotide changes identified at viral escape were selected. EC50 values of the original viruses were previously determined and are indicated in Supplementary Figure S2.

*d* Experimental identifier of the escape experiment, from which the reported sequence is derived.

*e* Sequences were from the indicated day following initiation of treatment at which peak infection was observed.

*f* Amino acid positions are numbered relative to the H77(AF009606) reference strain.

*g* Amino acid changes encoded by the given nucleotide changes are indicated.

**Supplementary Table S8.** Nucleotide changes identified in the NS3P of 5a(SA13) at the time of viral escape under telaprevir treatment

| Nucleotide position <sup>a</sup>          |                  |                  |                                 |      |     |     |
|-------------------------------------------|------------------|------------------|---------------------------------|------|-----|-----|
| 5a(SA13) plasmid                          | 3593             | 3780             | 3894                            | 3896 |     |     |
| H77 rel ref                               | 163              | 350              | 464                             | 466  |     |     |
| H77 abs ref                               | 3582             | 3769             | 3883                            | 3885 |     |     |
| 5a(SA13) nucleotide identity <sup>b</sup> |                  |                  |                                 |      |     |     |
|                                           | G                | G                | G                               | G    |     |     |
| Fold EC <sub>50</sub> <sup>c</sup>        | Exp <sup>d</sup> | Day <sup>e</sup> | Subclonal analysis <sup>f</sup> |      |     |     |
| <i>NT</i>                                 | 1                | 2                | •                               | •    | •   | •   |
| <i>NT</i>                                 | 1                | 4                | •                               | •    | •   | •   |
| <i>NT</i>                                 | 2                | 4                | •                               | •    | •   | •   |
| <i>NT</i>                                 | 2                | 6                | •                               | •    | •   | •   |
| <i>0.75x</i>                              | 2                | 22               | •                               | •    | A   | •   |
| <i>0.75x</i>                              | 2                | 25               | G/t                             | •    | A   | •   |
| <i>1x</i>                                 | 1                | 24               | •                               | •    | G/A | G/T |
| <i>1x</i>                                 | 1                | 26               | •                               | •    | g/A | •   |
| <i>2x</i>                                 | 2                | 36               | •                               | •    | g/A | G/t |
| <i>2x</i>                                 | 2                | 39               | •                               | •    | G/a | g/T |
| <i>4x</i>                                 | 1                | 38               | •                               | G/t  | •   | T   |
| <i>4x</i>                                 | 1                | 43               | •                               | •    | •   | T   |
| Amino acid position <sup>g</sup>          |                  |                  |                                 |      |     |     |
| H77 rel ref                               | 55               | 117              | 155                             | 156  |     |     |
| H77 abs ref                               | 1081             | 1143             | 1181                            | 1182 |     |     |
| 5a(SA13) amino acid change <sup>h</sup>   |                  |                  |                                 |      |     |     |
|                                           | V→F              | R→L              | R→K                             | A→S  |     |     |

For details, see footnote of Supplementary Table S2.



**Supplementary Table S9.** Nucleotide changes identified in the NS3P of 6a(HK6a) at the time of viral escape under telaprevir treatment

| Nucleotide position <sup>a</sup>          |                  |                  |      |      |      |      |      |      |     |                                  |
|-------------------------------------------|------------------|------------------|------|------|------|------|------|------|-----|----------------------------------|
| 6a(HK6a) plasmid                          |                  | 3537             | 3552 | 3558 | 3590 | 3782 | 3837 | 3896 |     |                                  |
| H77 rel ref                               |                  | 107              | 122  | 128  | 160  | 352  | 407  | 466  |     |                                  |
| H77 abs ref                               |                  | 3526             | 3541 | 3547 | 3579 | 3771 | 3826 | 3885 |     |                                  |
| 6a(HK6a) nucleotide identity <sup>b</sup> |                  |                  |      |      |      |      |      |      |     |                                  |
|                                           |                  | T                | A    | T    | A    | C    | A    | G    |     |                                  |
| Fold EC <sub>50</sub> <sup>c</sup>        | Exp <sup>d</sup> | Day <sup>e</sup> |      |      |      |      |      |      |     | Subclonal analysis <sup>f</sup>  |
| <i>NT</i>                                 | 1                | 4                | •    | •    | •    | •    | C/g  | A/g  | •   |                                  |
| <i>NT</i>                                 | 1                | 7                | •    | A/t  | •    | •    | •    | •    | •   |                                  |
| <i>NT</i>                                 | 2                | 2                | •    | •    | •    | •    | •    | •    | •   |                                  |
| <i>NT</i>                                 | 2                | 4                | •    | •    | •    | •    | C/g  | •    | •   |                                  |
| <i>NT</i>                                 | 3                | 5                | •    | •    | •    | •    | •    | •    | •   |                                  |
| <i>NT</i>                                 | 3                | 7                | •    | •    | •    | •    | •    | •    | •   |                                  |
| <i>0.75x</i>                              | 3                | 7                | •    | •    | •    | •    | •    | •    | •   |                                  |
| <i>0.75x</i>                              | 3                | 19               | •    | •    | •    | •    | •    | •    | •   |                                  |
| <i>1x</i>                                 | 2                | 15               | •    | •    | •    | G    | C/g  | •    | •   |                                  |
| <i>1x</i>                                 | 2                | 18               | •    | •    | T/g  | A/G  | C/g  | •    | •   | F43C (1); T54A (9)               |
| <i>2x</i>                                 | 3                | 19               | T/C  | •    | •    | A/G  | C/g  | •    | •   | V36A (5); T54A (3); original (1) |
| <i>2x</i>                                 | 3                | 21               | •    | •    | •    | A/g  | •    | •    | •   |                                  |
| <i>4x</i>                                 | 1                | 39               | •    | •    | •    | •    | •    | •    | g/T |                                  |
| <i>4x</i>                                 | 1                | 42               | •    | •    | •    | A/g  | C/g  | •    | g/T | A156S (9)                        |
| Amino acid position <sup>g</sup>          |                  |                  |      |      |      |      |      |      |     |                                  |
| H77 rel ref                               |                  | 36               | 41   | 43   | 54   | 118  | 136  | 156  |     |                                  |
| H77 abs ref                               |                  | 1062             | 1067 | 1069 | 1080 | 1144 | 1162 | 1182 |     |                                  |
| 6a(HK6a) amino acid change <sup>h</sup>   |                  |                  |      |      |      |      |      |      |     |                                  |
|                                           |                  | V→A              | Q→L  | F→C  | T→A  | R→G  | K→R  | A→S  |     |                                  |

For details, see footnote of Supplementary Table S2.

**Supplementary Table S10.** Nucleotide changes identified in the NS3P of 1a(TN) at the time of viral escape under boceprevir treatment

| Nucleotide position <sup>a</sup>        |                  |                  |                  |                  |      |      |      |      |   |                                                  |
|-----------------------------------------|------------------|------------------|------------------|------------------|------|------|------|------|---|--------------------------------------------------|
| 1a(TN) plasmid                          |                  | 3433             | 3471             | 3472             | 3579 | 3583 | 3630 | 3883 |   |                                                  |
| H77 rel ref                             |                  | 14               | 52               | 53               | 160  | 164  | 211  | 464  |   |                                                  |
| H77 abs ref                             |                  | 3433             | 3471             | 3472             | 3579 | 3583 | 3630 | 3883 |   |                                                  |
| 1a(TN) nucleotide identity <sup>b</sup> |                  | C                | A                | T                | A    | T    | G    | G    |   |                                                  |
| Fold EC <sub>50</sub> <sup>c</sup>      | Exp <sup>d</sup> | Day <sup>e</sup> |                  |                  |      |      |      |      |   | Subclonal analysis <sup>f</sup>                  |
| <i>NT</i>                               | 1                | 4                | •                | •                | •    | •    | •    | •    | • |                                                  |
| <i>NT</i>                               | 1                | 6                | •                | •                | •    | •    | •    | •    | • |                                                  |
| <i>0.75x</i>                            | 1                | 9                | •                | •                | •    | •    | T/C  | •    | • |                                                  |
| <i>0.75x</i>                            | 1                | 11               | C/g              | •                | •    | •    | T/C  | •    | • |                                                  |
| <i>1x</i>                               | 1                | 13               | •                | •                | •    | A/g  | T/C  | •    | • |                                                  |
| <i>1x</i>                               | 1                | 16               | •                | A/g              | •    | A/g  | T/C  | G/A  | • | I18V (2); V55A (1); T54A+V71I (2); V55A+V71I (4) |
| <i>2x</i>                               | 1                | 16               | •                | •                | •    | a/G  | T/c  | •    | • |                                                  |
| <i>2x</i>                               | 1                | 18               | •                | •                | •    | A/G  | T/c  | •    | • |                                                  |
| <i>4x</i>                               | 1                | 20               | •                | •                | •    | G    | •    | •    | • |                                                  |
| <i>4x</i>                               | 1                | 23               | •                | •                | •    | G    | •    | •    | • |                                                  |
| <i>16x</i>                              | 1                | 57               | •                | •                | C    | •    | •    | •    | C |                                                  |
| <i>16x</i>                              | 1                | 61               | •                | •                | C    | •    | •    | •    | C |                                                  |
| Amino acid position <sup>g</sup>        |                  |                  |                  |                  |      |      |      |      |   |                                                  |
| H77 rel ref                             |                  | 5                | 18               | 54               | 55   | 71   | 155  |      |   |                                                  |
| H77 abs ref                             |                  | 1031             | 1044             | 1080             | 1081 | 1097 | 1181 |      |   |                                                  |
| 1a(TN) amino acid change <sup>h</sup>   |                  | A→G              | I→V <sup>i</sup> | I→T <sup>i</sup> | T→A  | V→A  | V→I  | R→T  |   |                                                  |

For details, see footnote of Supplementary Table S2.

*i*, 1a(TN) nucleotide positions 3471 and 3472 are in the same codon; indicated nucleotide changes encode the indicated amino acid changes at amino acid position 18.

**Supplementary Table S11.** Nucleotide changes identified in the NS3P of 2a(JFH1) at the time of viral escape under boceprevir treatment

| Nucleotide position <sup>a</sup>          |                  |                  |      |      |      |      |      |     |                                 |
|-------------------------------------------|------------------|------------------|------|------|------|------|------|-----|---------------------------------|
| 2a(JFH1) plasmid                          |                  | 3465             | 3590 | 3824 | 3861 | 3897 | 3953 |     |                                 |
| H77 rel ref                               |                  | 35               | 160  | 394  | 431  | 467  | 523  |     |                                 |
| H77 abs ref                               |                  | 3454             | 3579 | 3813 | 3850 | 3886 | 3942 |     |                                 |
| 2a(JFH1) nucleotide identity <sup>b</sup> |                  | G                | A    | A    | T    | C    | C    |     |                                 |
| Fold EC <sub>50</sub> <sup>c</sup>        | Exp <sup>d</sup> | Day <sup>e</sup> |      |      |      |      |      |     | Subclonal analysis <sup>f</sup> |
| <i>NT</i>                                 | 1                | 4                | •    | •    | •    | •    | •    | •   |                                 |
| <i>NT</i>                                 | 1                | 6                | •    | •    | •    | •    | •    | •   |                                 |
| <i>NT</i>                                 | 2                | 5                | •    | •    | •    | •    | •    | •   |                                 |
| <i>NT</i>                                 | 2                | 7                | G/a  | •    | •    | •    | •    | •   |                                 |
| <i>0.75x</i>                              | 2                | 12               | •    | A/g  | •    | •    | •    | •   |                                 |
| <i>0.75x</i>                              | 2                | 14               | •    | A/g  | •    | •    | •    | •   |                                 |
| <i>1x</i>                                 | 2                | 13               | •    | A/G  | •    | •    | •    | C/t |                                 |
| <i>1x</i>                                 | 2                | 15               | •    | A/g  | •    | •    | •    | C/T |                                 |
| <i>2x</i>                                 | 2                | 16               | •    | A/g  | •    | •    | C/T  | •   |                                 |
| <i>2x</i>                                 | 2                | 19               | •    | A/g  | •    | T/g  | C/T  | •   | T54A (3); A156V (4)             |
| <i>4x</i>                                 | 1                | 15               | •    | •    | •    | •    | T    | •   |                                 |
| <i>4x</i>                                 | 1                | 17               | •    | •    | •    | •    | T    | •   |                                 |
| <i>16x</i>                                | 1                | 38               | •    | •    | •    | •    | T    | •   |                                 |
| <i>16x</i>                                | 1                | 40               | •    | •    | A/g  | •    | T    | •   |                                 |
| Amino acid position <sup>g</sup>          |                  |                  |      |      |      |      |      |     |                                 |
| H77 rel ref                               |                  | 12               | 54   | 132  | 144  | 156  | 175  |     |                                 |
| H77 abs ref                               |                  | 1038             | 1080 | 1158 | 1170 | 1182 | 1201 |     |                                 |
| 2a(JFH1) amino acid change <sup>h</sup>   |                  | G→D              | T→A  | I→V  | L→R  | A→V  | L→F  |     |                                 |

For details, see footnote of Supplementary Table S2.

**Supplementary Table S12.** Nucleotide changes identified in the NS3P of 2a(J6) at the time of viral escape under boceprevir treatment

| Nucleotide position <sup>a</sup>        |                  |                  |      |      |      |      |      |      |                                 |                         |
|-----------------------------------------|------------------|------------------|------|------|------|------|------|------|---------------------------------|-------------------------|
| 2a(J6) plasmid                          |                  | 3474             | 3483 | 3590 | 3645 | 3689 | 3723 | 3959 |                                 |                         |
| H77 rel ref                             |                  | 44               | 53   | 160  | 215  | 259  | 293  | 529  |                                 |                         |
| H77 abs ref                             |                  | 3463             | 3472 | 3579 | 3634 | 3678 | 3712 | 3948 |                                 |                         |
| 2a(J6) nucleotide identity <sup>b</sup> |                  |                  |      |      |      |      |      |      |                                 |                         |
|                                         |                  | G                | T    | A    | C    | A    | C    | A    |                                 |                         |
| Fold EC <sub>50</sub> <sup>c</sup>      | Exp <sup>d</sup> | Day <sup>e</sup> |      |      |      |      |      |      | Subclonal analysis <sup>f</sup> |                         |
| <i>NT</i>                               | 1                | 2                | •    | •    | •    | •    | •    | C/a  | •                               |                         |
| <i>NT</i>                               | 1                | 4                | •    | •    | •    | •    | •    | C/A  | •                               |                         |
| <i>NT</i>                               | 2                | 4                | •    | •    | •    | •    | •    | C/a  | •                               |                         |
| <i>NT</i>                               | 2                | 6                | •    | •    | •    | •    | A/c  | •    | •                               |                         |
| <i>0.75x</i>                            | 2                | 13               | •    | •    | A/g  | •    | •    | C/a  | •                               |                         |
| <i>0.75x</i>                            | 2                | 15               | •    | •    | A/g  | •    | •    | C/A  | •                               |                         |
| <i>1x</i>                               | 1                | 28               | •    | •    | A/G  | C/t  | •    | c/A  | •                               |                         |
| <i>1x</i>                               | 1                | 31               | •    | •    | a/G  | C/t  | •    | C/A  | •                               | T54A (9); T72M (3)      |
| <i>2x</i>                               | 2                | 24               | G/a  | T/c  | G    | •    | •    | c/A  | A/g                             | T54A+T98K (5); T98K (1) |
| <i>2x</i>                               | 2                | 26               | •    | T/c  | a/G  | •    | •    | c/A  | A/g                             |                         |
| Amino acid position <sup>g</sup>        |                  |                  |      |      |      |      |      |      |                                 |                         |
| H77 rel ref                             |                  | 15               | 18   | 54   | 72   | 87   | 98   | 177  |                                 |                         |
| H77 abs ref                             |                  | 1041             | 1044 | 1080 | 1098 | 1113 | 1124 | 1203 |                                 |                         |
| 2a(J6) amino acid change <sup>h</sup>   |                  |                  |      |      |      |      |      |      |                                 |                         |
|                                         |                  | G→D              | V→A  | T→A  | T→M  | S→R  | T→K  | I→V  |                                 |                         |

For details, see footnote of Supplementary Table S2.

**Supplementary Table S13.** Nucleotide changes identified in the NS3P of 3a(S52) at the time of viral escape under boceprevir treatment

| Nucleotide position <sup>a</sup>         |                  |                  |                                 |      |     |                                       |
|------------------------------------------|------------------|------------------|---------------------------------|------|-----|---------------------------------------|
| 3a(S52) plasmid                          | 3590             | 3594             | 3660                            | 3894 |     |                                       |
| H77 rel ref                              | 160              | 164              | 230                             | 464  |     |                                       |
| H77 abs ref                              | 3579             | 3583             | 3649                            | 3883 |     |                                       |
| 3a(S52) nucleotide identity <sup>b</sup> |                  |                  |                                 |      |     |                                       |
|                                          |                  |                  | A                               | T    | A   | G                                     |
| Fold EC <sub>50</sub> <sup>c</sup>       | Exp <sup>d</sup> | Day <sup>e</sup> | Subclonal analysis <sup>f</sup> |      |     |                                       |
| <i>NT</i>                                | 1                | 4                | •                               | •    | •   | •                                     |
| <i>NT</i>                                | 1                | 6                | •                               | •    | •   | •                                     |
| <i>NT</i>                                | 2                | 4                | •                               | •    | •   | •                                     |
| <i>NT</i>                                | 2                | 6                | •                               | •    | •   | •                                     |
| <i>0.75x</i>                             | 2                | 25               | A/G                             | T/c  | •   | G/a T54A (6); R155K (2); original (2) |
| <i>0.75x</i>                             | 2                | 27               | A/g                             | •    | A/g | •                                     |
| <i>1x</i>                                | 1                | 22               | A/G                             | •    | •   | G/a T54A (3); R155K (2)               |
| <i>1x</i>                                | 1                | 29               | A/G                             | •    | •   | •                                     |
| <i>2x</i>                                | 2                | 40               | •                               | •    | •   | A                                     |
| <i>2x</i>                                | 2                | 42               | •                               | •    | •   | A                                     |
| <i>4x</i>                                | 1                | 35               | •                               | •    | •   | A                                     |
| <i>4x</i>                                | 1                | 40               | •                               | •    | •   | A                                     |
| Amino acid position <sup>g</sup>         |                  |                  |                                 |      |     |                                       |
| H77 rel ref                              | 54               | 55               | 77                              | 155  |     |                                       |
| H77 abs ref                              | 1080             | 1081             | 1103                            | 1181 |     |                                       |
| 3a(S52) amino acid change <sup>h</sup>   |                  |                  |                                 |      |     |                                       |
|                                          |                  |                  | T→A                             | V→A  | N→S | R→K                                   |

For details, see footnote of Supplementary Table S2.

**Supplementary Table S14.** Nucleotide changes identified in the NS3P of 3a(452) at the time of viral escape under boceprevir treatment

| Nucleotide position <sup>a</sup>         |                  |                  |      |      |      |      |                                             |
|------------------------------------------|------------------|------------------|------|------|------|------|---------------------------------------------|
| 3a(452) plasmid                          |                  |                  | 3894 | 3926 | 3933 | 3939 |                                             |
| H77 rel ref                              |                  |                  | 464  | 496  | 503  | 509  |                                             |
| H77 abs ref                              |                  |                  | 3883 | 3915 | 3922 | 3928 |                                             |
| 3a(452) nucleotide identity <sup>b</sup> |                  |                  |      |      |      |      |                                             |
|                                          |                  |                  | G    | G    | A    | T    |                                             |
| Fold EC <sub>50</sub> <sup>c</sup>       | Exp <sup>d</sup> | Day <sup>e</sup> |      |      |      |      | Subclonal analysis <sup>f</sup>             |
| <i>NT</i>                                | 1                | 4                | •    | •    | •    | •    |                                             |
| <i>NT</i>                                | 1                | 6                | •    | •    | •    | •    |                                             |
| <i>0.75x</i>                             | 1                | 22               | •    | •    | •    | •    |                                             |
| <i>0.75x</i>                             | 1                | 25               | •    | •    | •    | T/C  |                                             |
| <i>1x</i>                                | 1                | 27               | G/a  | G/a  | •    | T/c  | R155K (1); A166T (5); I170T (7)             |
| <i>1x</i>                                | 1                | 29               | •    | •    | •    | C    |                                             |
| <i>2x</i>                                | 1                | 57               | g/A  | G/a  | •    | •    | R155K (2); R155K+Q168K (1); A166T+Q168R (1) |
| <i>2x</i>                                | 1                | 60               | g/A  | g/A  | a/G  | •    | R155K (2); R155K+Q168R (2); A166T+Q168R (4) |
| Amino acid position <sup>g</sup>         |                  |                  |      |      |      |      |                                             |
| H77 rel ref                              |                  |                  | 155  | 166  | 168  | 170  |                                             |
| H77 abs ref                              |                  |                  | 1181 | 1192 | 1194 | 1196 |                                             |
| 3a(452) amino acid change <sup>h</sup>   |                  |                  |      |      |      |      |                                             |
|                                          |                  |                  | R→K  | A→T  | Q→R  | I→T  |                                             |

For details, see footnote of Supplementary Table S2.

**Supplementary Table S15.** Nucleotide changes identified in the NS3P of 4a(ED43) at the time of viral escape under boceprevir treatment

| <b>Nucleotide position<sup>a</sup></b>          |                        |                        |             |             |             |     |
|-------------------------------------------------|------------------------|------------------------|-------------|-------------|-------------|-----|
| <b>4a(ED43) plasmid</b>                         |                        | <b>3645</b>            | <b>3648</b> | <b>3743</b> | <b>3884</b> |     |
| <b>H77 rel ref</b>                              |                        | <b>227</b>             | <b>230</b>  | <b>325</b>  | <b>466</b>  |     |
| <b>H77 abs ref</b>                              |                        | <b>3646</b>            | <b>3649</b> | <b>3744</b> | <b>3885</b> |     |
| <b>4a(ED43) nucleotide identity<sup>b</sup></b> |                        | <b>C</b>               | <b>A</b>    | <b>A</b>    | <b>G</b>    |     |
| <b>Fold EC<sub>50</sub><sup>c</sup></b>         | <b>Exp<sup>d</sup></b> | <b>Day<sup>e</sup></b> |             |             |             |     |
| <i>NT</i>                                       | 1                      | 4                      | •           | •           | •           | •   |
| <i>NT</i>                                       | 1                      | 7                      | •           | •           | •           | •   |
| <i>0.75x</i>                                    | 1                      | 11                     | •           | •           | •           | •   |
| <i>0.75x</i>                                    | 1                      | 18                     | •           | •           | A/g         | •   |
| <i>1x</i>                                       | 1                      | 53                     | C/t         | •           | •           | G/T |
| <i>1x</i>                                       | 1                      | 60                     | C/t         | •           | •           | G/T |
| <i>2x</i>                                       | 1                      | 60                     | •           | G           | •           | •   |
| <i>2x</i>                                       | 1                      | 62                     | •           | G           | •           | •   |
| <b>Amino acid position<sup>f</sup></b>          |                        |                        |             |             |             |     |
| <b>H77 rel ref</b>                              |                        | <b>76</b>              | <b>77</b>   | <b>109</b>  | <b>156</b>  |     |
| <b>H77 abs ref</b>                              |                        | <b>1102</b>            | <b>1103</b> | <b>1135</b> | <b>1182</b> |     |
| <b>4a(ED43) amino acid change<sup>g</sup></b>   |                        | <b>T→I</b>             | <b>N→S</b>  | <b>R→G</b>  | <b>A→S</b>  |     |

For details, see footnote of Supplementary Table S7.

**Supplementary Table S16.** Nucleotide changes identified in the NS3P of 5a(SA13) at the time of viral escape under boceprevir treatment

| Nucleotide position <sup>a</sup>          |                  |                  |                                 |      |      |     |     |
|-------------------------------------------|------------------|------------------|---------------------------------|------|------|-----|-----|
| 5a(SA13) plasmid                          | 3482             | 3519             | 3591                            | 3894 | 3896 |     |     |
| H77 rel ref                               | 52               | 89               | 161                             | 464  | 466  |     |     |
| H77 abs ref                               | 3471             | 3508             | 3580                            | 3883 | 3885 |     |     |
| 5a(SA13) nucleotide identity <sup>b</sup> |                  |                  |                                 |      |      |     |     |
|                                           | A                | A                | C                               | G    | G    |     |     |
| Fold EC <sub>50</sub> <sup>c</sup>        | Exp <sup>d</sup> | Day <sup>e</sup> | Subclonal analysis <sup>f</sup> |      |      |     |     |
| <i>NT</i>                                 | 1                | 2                | •                               | •    | •    | •   | •   |
| <i>NT</i>                                 | 1                | 4                | •                               | •    | •    | •   | •   |
| <i>NT</i>                                 | 2                | 4                | •                               | •    | •    | •   | •   |
| <i>NT</i>                                 | 2                | 6                | •                               | •    | •    | •   | •   |
| <i>0.75x</i>                              | 2                | 25               | •                               | •    | c/G  | A   | •   |
| <i>0.75x</i>                              | 2                | 29               | •                               | •    | C/g  | A   | •   |
| <i>1x</i>                                 | 1                | 26               | A/g                             | •    | •    | G/A | G/t |
| <i>1x</i>                                 | 1                | 29               | A/g                             | •    | •    | G/A | G/t |
| <i>2x</i>                                 | 2                | 45               | •                               | A/t  | •    | •   | T   |
| <i>2x</i>                                 | 2                | 49               | •                               | •    | •    | •   | T   |
| R155K (4); A156S (7); I18V+R155K (3)      |                  |                  |                                 |      |      |     |     |
| Amino acid position <sup>g</sup>          |                  |                  |                                 |      |      |     |     |
| H77 rel ref                               | 18               | 30               | 54                              | 155  | 156  |     |     |
| H77 abs ref                               | 1044             | 1056             | 1080                            | 1181 | 1182 |     |     |
| 5a(SA13) amino acid change <sup>h</sup>   |                  |                  |                                 |      |      |     |     |
|                                           | I→V              | E→V              | T→S                             | R→K  | A→S  |     |     |

For details, see footnote of Supplementary Table S2.



**Supplementary Table S17.** Nucleotide changes identified in the NS3P of 6a(HK6a) at the time of viral escape under boceprevir treatment

| Nucleotide position <sup>a</sup>          |                  |                  |      |      |      |      |      |      |      |      |      |                                 |                                |
|-------------------------------------------|------------------|------------------|------|------|------|------|------|------|------|------|------|---------------------------------|--------------------------------|
| 6a(HK6a) plasmid                          |                  | 3552             | 3590 | 3633 | 3782 | 3821 | 3837 | 3855 | 3896 | 3902 | 3942 |                                 |                                |
| H77 rel ref                               |                  | 122              | 160  | 203  | 352  | 391  | 407  | 425  | 466  | 472  | 512  |                                 |                                |
| H77 abs ref                               |                  | 3541             | 3579 | 3622 | 3771 | 3810 | 3826 | 3844 | 3885 | 3891 | 3931 |                                 |                                |
| 6a(HK6a) nucleotide identity <sup>b</sup> |                  | A                | A    | A    | C    | C    | A    | C    | G    | G    | C    |                                 |                                |
| Fold EC <sub>50</sub> <sup>c</sup>        | Exp <sup>d</sup> | Day <sup>e</sup> |      |      |      |      |      |      |      |      |      | Subclonal analysis <sup>f</sup> |                                |
| <i>NT</i>                                 | 1                | 2                | •    | •    | •    | •    | •    | •    | •    | •    | •    | •                               |                                |
| <i>NT</i>                                 | 1                | 4                | •    | •    | •    | C/g  | •    | •    | •    | •    | •    | •                               |                                |
| <i>NT</i>                                 | 2                | 5                | •    | •    | •    | •    | •    | •    | •    | •    | •    | •                               |                                |
| <i>NT</i>                                 | 2                | 7                | •    | •    | •    | •    | •    | •    | •    | •    | •    | •                               |                                |
| <i>0.75x</i>                              | 2                | 14               | •    | a/G  | •    | •    | •    | •    | •    | •    | •    | •                               |                                |
| <i>0.75x</i>                              | 2                | 16               | •    | A/G  | •    | •    | •    | •    | •    | •    | •    | •                               |                                |
| <i>1x</i>                                 | 1                | 15               | •    | a/G  | •    | •    | •    | •    | •    | •    | •    | •                               |                                |
| <i>1x</i>                                 | 1                | 18               | •    | a/G  | •    | •    | •    | •    | •    | •    | •    | C/t                             | T54A (6); original (2)         |
| <i>2x</i>                                 | 2                | 30               | •    | G    | A/g  | •    | C/t  | •    | •    | •    | •    | •                               |                                |
| <i>2x</i>                                 | 2                | 33               | •    | G    | •    | •    | •    | •    | C/g  | •    | •    | •                               |                                |
| <i>4x</i>                                 | 1                | 53               | •    | G    | •    | •    | •    | •    | •    | G/T  | G/A  | •                               |                                |
| <i>4x</i>                                 | 1                | 55               | •    | G    | •    | •    | •    | •    | •    | G/T  | G/A  | •                               | T54A+A156S (4); T54A+V158I (3) |
| Amino acid position <sup>g</sup>          |                  |                  |      |      |      |      |      |      |      |      |      |                                 |                                |
| H77 rel ref                               |                  | 41               | 54   | 68   | 118  | 131  | 136  | 142  | 156  | 158  | 171  |                                 |                                |
| H77 abs ref                               |                  | 1067             | 1080 | 1094 | 1144 | 1157 | 1162 | 1168 | 1182 | 1184 | 1197 |                                 |                                |
| 6a(HK6a) amino acid change <sup>h</sup>   |                  | Q→L              | T→A  | K→R  | R→G  | P→S  | K→R  | P→R  | A→S  | V→I  | P→L  |                                 |                                |

For details, see footnote of Supplementary Table S2.

**Supplementary Table S18.** Nucleotide changes identified in the NS3P of 2a(JFH1) at the time of viral escape under vaniprevir (MK-7009) treatment

| <b>Nucleotide position<sup>a</sup></b>          |                  |                  |      |      |                      |
|-------------------------------------------------|------------------|------------------|------|------|----------------------|
| 2a(JFH1) plasmid                                |                  |                  | 3897 | 3900 | 3933                 |
| H77 rel ref                                     |                  |                  | 467  | 470  | 503                  |
| H77 abs ref                                     |                  |                  | 3886 | 3889 | 3922                 |
| <b>2a(JFH1) nucleotide identity<sup>b</sup></b> |                  |                  |      |      |                      |
| Fold EC <sub>50</sub> <sup>c</sup>              | Exp <sup>d</sup> | Day <sup>e</sup> | C    | C    | A                    |
| <i>NT</i>                                       | 1                | 5                | •    | •    | •                    |
| <i>NT</i>                                       | 1                | 7                | •    | •    | •                    |
| <i>4x</i>                                       | 1                | 13               | •    | •    | a/c/g/t              |
| <i>4x</i>                                       | 1                | 15               | •    | •    | a/c/g/t              |
| <i>16x</i>                                      | 1                | 15               | C/t  | •    | a/C/g/t              |
| <i>16x</i>                                      | 1                | 17               | C/t  | C/t  | a/C/g/t              |
| <i>64x</i>                                      | 1                | 20               | c/T  | •    | A/t                  |
| <i>64x</i>                                      | 1                | 22               | C/T  | •    | A/t                  |
| <b>Amino acid position<sup>f</sup></b>          |                  |                  |      |      |                      |
| H77 rel ref                                     |                  |                  | 156  | 157  | 168                  |
| H77 abs ref                                     |                  |                  | 1182 | 1183 | 1194                 |
| <b>2a(JFH1) amino acid change<sup>g</sup></b>   |                  |                  |      |      |                      |
|                                                 |                  |                  | A→V  | A→V  | D→A/G/V <sup>h</sup> |

For details, see footnote of Supplementary Table S7.

*c* Fold EC50 of PI under which the indicated nucleotide changes identified at viral escape were selected. EC50 values of the original viruses were previously determined and are indicated in Supplementary Figure S3.

*h*, A3933C results in D168A; A3933G results in D168G; A3933T results in D168V.

**Supplementary Table S19.** Nucleotide changes identified in the NS3P of 2a(JFH1) at the time of viral escape under faldaprevir (BI 201335) treatment

| <b>Nucleotide position<sup>a</sup></b>          |                        |                        |            |            |            |                          |            |
|-------------------------------------------------|------------------------|------------------------|------------|------------|------------|--------------------------|------------|
| <b>2a(JFH1) plasmid</b>                         |                        |                        | 3657       | 3896       | 3897       | 3933                     | 3939       |
| <b>H77 rel ref</b>                              |                        |                        | <b>227</b> | <b>466</b> | <b>467</b> | <b>503</b>               | <b>509</b> |
| H77 abs ref                                     |                        |                        | 3646       | 3885       | 3886       | 3922                     | 3928       |
| <b>2a(JFH1) nucleotide identity<sup>b</sup></b> |                        |                        |            |            |            |                          |            |
|                                                 |                        |                        | <b>C</b>   | <b>G</b>   | <b>C</b>   | <b>A</b>                 | <b>T</b>   |
| <b>Fold EC<sub>50</sub><sup>c</sup></b>         | <b>Exp<sup>d</sup></b> | <b>Day<sup>e</sup></b> |            |            |            |                          |            |
| <i>NT</i>                                       | 1                      | 5                      | •          | •          | •          | •                        | •          |
| <i>NT</i>                                       | 1                      | 7                      | •          | •          | •          | •                        | •          |
| <i>1x</i>                                       | 1                      | 12                     | •          | •          | •          | •                        | •          |
| <i>1x</i>                                       | 1                      | 16                     | •          | •          | •          | •                        | •          |
| <i>2x</i>                                       | 1                      | 16                     | •          | •          | •          | A/C/t                    | •          |
| <i>2x</i>                                       | 1                      | 19                     | •          | •          | •          | A/C/t                    | •          |
| <i>4x</i>                                       | 1                      | 15                     | C/t        | •          | •          | A/t                      | T/c        |
| <i>4x</i>                                       | 1                      | 19                     | •          | •          | •          | a/T                      | •          |
| <i>16x</i>                                      | 1                      | 14                     | •          | G/a        | •          | •                        | •          |
| <i>16x</i>                                      | 1                      | 19                     | •          | G/A        | •          | •                        | •          |
| <i>64x</i>                                      | 1                      | 33                     | •          | •          | T          | •                        | •          |
| <i>64x</i>                                      | 1                      | 35                     | •          | •          | T          | •                        | •          |
| <b>Amino acid position<sup>f</sup></b>          |                        |                        |            |            |            |                          |            |
| <b>H77 rel ref</b>                              |                        |                        | <b>76</b>  | <b>156</b> | <b>156</b> | <b>168</b>               | <b>170</b> |
| H77 abs ref                                     |                        |                        | 1102       | 1182       | 1182       | 1194                     | 1196       |
| <b>2a(JFH1) amino acid change<sup>g</sup></b>   |                        |                        |            |            |            |                          |            |
|                                                 |                        |                        | <b>S→L</b> | <b>A→T</b> | <b>A→V</b> | <b>D→A/V<sup>h</sup></b> | <b>I→T</b> |

For details, see footnote of Supplementary Table S7.

*c* Fold EC50 of PI under which the indicated nucleotide changes identified at viral escape were selected. EC50 values of the original viruses were previously determined and are indicated in Supplementary Figure S3.

*h*, A3933C results in D168A; A3933T results in D168V.

**Supplementary Table S20.** Nucleotide changes identified in the NS3P of 2a(JFH1) at the time of viral escape under simeprevir (TMC435350) treatment

| Nucleotide position <sup>a</sup>          |      |      |      |                  |                    |  |
|-------------------------------------------|------|------|------|------------------|--------------------|--|
| 2a(JFH1) plasmid                          | 3596 | 3627 | 3666 | 3932             | 3933               |  |
| H77 rel ref                               | 166  | 197  | 236  | 502              | 503                |  |
| H77 abs ref                               | 3585 | 3616 | 3655 | 3921             | 3922               |  |
| 2a(JFH1) nucleotide identity <sup>b</sup> |      |      |      |                  |                    |  |
|                                           | T    | G    | A    | G                | A                  |  |
| Fold EC <sub>50</sub> <sup>c</sup>        |      |      |      |                  |                    |  |
| Exp <sup>d</sup>                          |      |      |      |                  |                    |  |
| Day <sup>e</sup>                          |      |      |      |                  |                    |  |
| <i>NT</i>                                 | •    | •    | •    | •                | •                  |  |
| <i>NT</i>                                 | •    | G/a  | •    | •                | •                  |  |
| <i>4x</i>                                 | T/c  | •    | A/g  | •                | •                  |  |
| <i>16x</i>                                | •    | •    | •    | G/t              | A/c/T              |  |
| <i>16x</i>                                | •    | •    | •    | •                | A/c/T              |  |
| <i>64x</i>                                | •    | •    | •    | •                | T                  |  |
| <i>64x</i>                                | •    | •    | •    | •                | T                  |  |
| Amino acid position <sup>f</sup>          |      |      |      |                  |                    |  |
| H77 rel ref                               | 56   | 66   | 79   | 168              | 168                |  |
| H77 abs ref                               | 1082 | 1092 | 1105 | 1194             | 1194               |  |
| 2a(JFH1) amino acid change <sup>g</sup>   |      |      |      |                  |                    |  |
|                                           | Y→H  | G→D  | E→G  | D→Y <sup>h</sup> | D→A/V <sup>i</sup> |  |

For details, see footnote of Supplementary Table S7.

*c* Fold EC50 of PI under which the indicated nucleotide changes identified at viral escape were selected. EC50 values of the original viruses were previously determined and are indicated in Supplementary Figure S3.

*h*, 2a(JFH1) nucleotide positions 3932 and 3933 are in the same codon; indicated nucleotide changes encode the indicated amino acid changes at amino acid position 168.

*i*, A3933C results in D168A; A3933T results in D168V.

**Supplementary Table S21.** Nucleotide changes identified in the NS3P of 2a(JFH1) at the time of viral escape under deldeprevir (ACH-2684) treatment

| <b>Nucleotide position<sup>a</sup></b>          |                        |                        |             |             |             |                          |
|-------------------------------------------------|------------------------|------------------------|-------------|-------------|-------------|--------------------------|
| 2a(JFH1) plasmid                                |                        |                        | <b>3596</b> | <b>3666</b> | <b>3897</b> | <b>3933</b>              |
| H77 rel ref                                     |                        |                        | <b>166</b>  | <b>236</b>  | <b>467</b>  | <b>503</b>               |
| H77 abs ref                                     |                        |                        | 3585        | 3655        | 3886        | 3922                     |
| <b>2a(JFH1) nucleotide identity<sup>b</sup></b> |                        |                        |             |             |             |                          |
|                                                 |                        |                        | <b>T</b>    | <b>A</b>    | <b>C</b>    | <b>A</b>                 |
| <b>Fold EC<sub>50</sub><sup>c</sup></b>         | <b>Exp<sup>d</sup></b> | <b>Day<sup>e</sup></b> |             |             |             |                          |
| <i>NT</i>                                       | 1                      | 5                      | •           | •           | •           | •                        |
| <i>NT</i>                                       | 1                      | 7                      | •           | •           | •           | •                        |
| <i>1x</i>                                       | 1                      | 7                      | •           | •           | •           | •                        |
| <i>1x</i>                                       | 1                      | 10                     | •           | •           | •           | •                        |
| <i>2x</i>                                       | 1                      | 10                     | T/c         | A/g         | •           | •                        |
| <i>2x</i>                                       | 1                      | 12                     | T/c         | A/g         | •           | •                        |
| <i>4x</i>                                       | 1                      | 12                     | T/c         | •           | •           | A/C                      |
| <i>4x</i>                                       | 1                      | 14                     | T/c         | •           | •           | A/C                      |
| <i>16x</i>                                      | 1                      | 12                     | •           | •           | •           | A/c/T                    |
| <i>16x</i>                                      | 1                      | 17                     | •           | •           | •           | A/c/T                    |
| <i>64x</i>                                      | 1                      | 14                     | •           | •           | C/T         | A/t                      |
| <i>64x</i>                                      | 1                      | 19                     | •           | •           | C/T         | A/t                      |
| <b>Amino acid position<sup>f</sup></b>          |                        |                        |             |             |             |                          |
| H77 rel ref                                     |                        |                        | <b>56</b>   | <b>79</b>   | <b>156</b>  | <b>168</b>               |
| H77 abs ref                                     |                        |                        | 1082        | 1105        | 1182        | 1194                     |
| <b>2a(JFH1) amino acid change<sup>g</sup></b>   |                        |                        |             |             |             |                          |
|                                                 |                        |                        | <b>Y→H</b>  | <b>E→G</b>  | <b>A→V</b>  | <b>D→A/V<sup>h</sup></b> |

For details, see footnote of Supplementary Table S7.

*c* Fold EC50 of PI under which the indicated nucleotide changes identified at viral escape were selected. EC50 values of the original viruses were previously determined and are indicated in Supplementary Figure S3.

*h*, A3933C results in D168A; A3933T results in D168V.

**Supplementary Table S22.** Nucleotide changes identified in the NS3P of 2a(JFH1) at the time of viral escape under paritaprevir (ABT-450) treatment

| <b>Nucleotide position<sup>a</sup></b>          |                        |                        |             |             |             |             |             |             |     |
|-------------------------------------------------|------------------------|------------------------|-------------|-------------|-------------|-------------|-------------|-------------|-----|
| <b>2a(JFH1) plasmid</b>                         |                        | <b>3437</b>            | <b>3557</b> | <b>3596</b> | <b>3630</b> | <b>3795</b> | <b>3897</b> | <b>3933</b> |     |
| <b>H77 rel ref</b>                              |                        | <b>7</b>               | <b>127</b>  | <b>166</b>  | <b>200</b>  | <b>365</b>  | <b>467</b>  | <b>503</b>  |     |
| <b>H77 abs ref</b>                              |                        | <b>3426</b>            | <b>3546</b> | <b>3585</b> | <b>3619</b> | <b>3784</b> | <b>3886</b> | <b>3922</b> |     |
| <b>2a(JFH1) nucleotide identity<sup>b</sup></b> |                        |                        |             |             |             |             |             |             |     |
|                                                 |                        | <b>A</b>               | <b>T</b>    | <b>T</b>    | <b>T</b>    | <b>A</b>    | <b>C</b>    | <b>A</b>    |     |
| <b>Fold EC<sub>50</sub><sup>c</sup></b>         | <b>Exp<sup>d</sup></b> | <b>Day<sup>e</sup></b> |             |             |             |             |             |             |     |
| <i>NT</i>                                       | 1                      | 5                      | •           | •           | •           | •           | •           | •           | •   |
| <i>NT</i>                                       | 1                      | 7                      | •           | •           | •           | •           | •           | •           | •   |
| <i>1x</i>                                       | 1                      | 9                      | •           | •           | •           | •           | •           | •           | •   |
| <i>1x</i>                                       | 1                      | 14                     | •           | •           | •           | •           | •           | •           | •   |
| <i>2x</i>                                       | 1                      | 14                     | •           | •           | T/c         | •           | a/C         | C/T         | •   |
| <i>4x</i>                                       | 1                      | 14                     | •           | •           | T/C         | •           | •           | •           | A/C |
| <i>4x</i>                                       | 1                      | 16                     | •           | •           | T/C         | •           | •           | •           | A/C |
| <i>16x</i>                                      | 1                      | 19                     | •           | G           | •           | C           | •           | •           | •   |
| <i>16x</i>                                      | 1                      | 21                     | •           | G           | •           | C           | •           | •           | •   |
| <i>16x</i>                                      | 1                      | 23                     | A/g         | G           | •           | C           | •           | •           | •   |
| <b>Amino acid position<sup>f</sup></b>          |                        |                        |             |             |             |             |             |             |     |
| <b>H77 rel ref</b>                              |                        | <b>3</b>               | <b>43</b>   | <b>56</b>   | <b>67</b>   | <b>122</b>  | <b>156</b>  | <b>168</b>  |     |
| <b>H77 abs ref</b>                              |                        | <b>1029</b>            | <b>1069</b> | <b>1082</b> | <b>1093</b> | <b>1148</b> | <b>1182</b> | <b>1194</b> |     |
| <b>2a(JFH1) amino acid change<sup>g</sup></b>   |                        |                        |             |             |             |             |             |             |     |
|                                                 |                        | <b>I→V</b>             | <b>F→V</b>  | <b>Y→H</b>  | <b>L→S</b>  | <b>K→T</b>  | <b>A→V</b>  | <b>D→A</b>  |     |

For details, see footnote of Supplementary Table S7.

<sup>c</sup> Fold EC50 of PI under which the indicated nucleotide changes identified at viral escape were selected. EC50 values of the original viruses were previously determined and are indicated in Supplementary Figure S3.

**Supplementary Table S23.** Nucleotide changes identified in the NS3P of 2a(JFH1) at the time of viral escape under grazoprevir (MK-5172) treatment

| <b>Nucleotide position<sup>a</sup></b>          |      |      |      |      |      |  |
|-------------------------------------------------|------|------|------|------|------|--|
| 2a(JFH1) plasmid                                | 3630 | 3645 | 3705 | 3897 | 3934 |  |
| H77 rel ref                                     | 200  | 215  | 275  | 467  | 504  |  |
| H77 abs ref                                     | 3619 | 3634 | 3694 | 3886 | 3923 |  |
| <b>2a(JFH1) nucleotide identity<sup>b</sup></b> |      |      |      |      |      |  |
|                                                 | T    | C    | A    | C    | T    |  |
| <b>Fold EC<sub>50</sub><sup>c</sup></b>         |      |      |      |      |      |  |
| <b>Exp<sup>d</sup></b>                          |      |      |      |      |      |  |
| <b>Day<sup>e</sup></b>                          |      |      |      |      |      |  |
| <i>NT</i>                                       | •    | •    | •    | •    | •    |  |
| <i>NT</i>                                       | •    | •    | •    | •    | •    |  |
| <i>4x</i>                                       | •    | •    | •    | T    | •    |  |
| <i>4x</i>                                       | •    | •    | •    | T    | •    |  |
| <i>16x</i>                                      | •    | •    | A/G  | T    | •    |  |
| <i>16x</i>                                      | •    | •    | A/G  | T    | •    |  |
| <i>64x</i>                                      | T/c  | C/T  | •    | T    | •    |  |
| <i>64x</i>                                      | T/c  | C/t  | •    | T    | T/g  |  |
| <b>Amino acid position<sup>f</sup></b>          |      |      |      |      |      |  |
| H77 rel ref                                     | 67   | 72   | 92   | 156  | 168  |  |
| H77 abs ref                                     | 1093 | 1098 | 1118 | 1182 | 1194 |  |
| <b>2a(JFH1) amino acid change<sup>g</sup></b>   |      |      |      |      |      |  |
|                                                 | L→S  | T→M  | K→R  | A→V  | D→E  |  |

For details, see footnote of Supplementary Table S7.

*c* Fold EC50 of PI under which the indicated nucleotide changes identified at viral escape were selected. EC50 values of the original viruses were previously determined and are indicated in Supplementary Figure S3.

## Reference List

1. **Li, Y. P., S. Ramirez, S. B. Jensen, R. H. Purcell, J. M. Gottwein, and J. Bukh.** 2012. Highly efficient full-length hepatitis C virus genotype 1 (strain TN) infectious culture system. *Proc.Natl.Acad.Sci.U.S.A.* **109**:19757-19762.
2. **Lindenbach, B. D., M. J. Evans, A. J. Syder, B. Wolk, T. L. Tellinghuisen, C. C. Liu, T. Maruyama, R. O. Hynes, D. R. Burton, J. A. McKeating, and C. M. Rice.** 2005. Complete replication of hepatitis C virus in cell culture. *Science* **309**:623-626.
3. **Gottwein, J. M., T. K. Scheel, T. B. Jensen, L. Ghanem, and J. Bukh.** 2011. Differential efficacy of protease inhibitors against HCV genotypes 2a, 3a, 5a, and 6a NS3/4A protease recombinant viruses. *Gastroenterology.* **141**:1067-1079.
4. **Li, Y. P., S. Ramirez, D. Humes, S. B. Jensen, J. M. Gottwein, and J. Bukh.** 2014. Differential Sensitivity of 5'UTR-NS5A Recombinants of Hepatitis C Virus Genotypes 1-6 to Protease and NS5A Inhibitors. *Gastroenterology* **146**:812-821.
5. **Scheel, T. K., J. M. Gottwein, L. S. Mikkelsen, T. B. Jensen, and J. Bukh.** 2011. Recombinant HCV variants with NS5A from genotypes 1-7 have different sensitivities to an NS5A inhibitor but not interferon-alpha. *Gastroenterology.* **140**:1032-1042.
6. **Jensen, S. B., S. B. Serre, D. G. Humes, S. Ramirez, Y. P. Li, J. Bukh, and J. M. Gottwein.** 2015. Substitutions at Hepatitis C Virus Genotypes 2-6 NS3 Residues 155, 156, or 168 Induce Complex Patterns of Protease Inhibitor Resistance. *Antimicrob.Agents Chemother.* **59**:7426-7436.
